1 Title page

2 Title: The use of mutants and inhibitors to study sterol  
3 biosynthesis in plants

4

5 Authors: Kjell De Vriese<sup>1,2</sup>, Jacob Pollier<sup>1,2,3</sup>, Alain Goossens<sup>1,2</sup>, Tom Beeckman<sup>1,2</sup>, Steffen  
6 Vanneste<sup>1,2,4,\*</sup>

7 Affiliations:

8 1: Department of Plant Biotechnology and Bioinformatics, Ghent University, Technologiepark 71, 9052 Ghent,  
9 Belgium

10 2: VIB Center for Plant Systems Biology, VIB, Technologiepark 71, 9052 Ghent, Belgium

11 3: VIB Metabolomics Core, Technologiepark 71, 9052 Ghent, Belgium

12 4: Lab of Plant Growth Analysis, Ghent University Global Campus, Songdomunhwa-Ro, 119, Yeonsu-gu, Incheon  
13 21985, Republic of Korea

14

15 e-mails:

16 K.D.V: [kjvri@psb.vib-ugent.be](mailto:kjvri@psb.vib-ugent.be)

17 J.P: [japol@psb.vib-ugent.be](mailto:japol@psb.vib-ugent.be)

18 A.G. [algoo@psb.vib-ugent.be](mailto:algoo@psb.vib-ugent.be)

19 T.B. [tobee@psb.vib-ugent.be](mailto:tobee@psb.vib-ugent.be)

20 S.V. [stnes@psb.vib-ugent.be](mailto:stnes@psb.vib-ugent.be)

21

22 \*Corresponding author

23 Tel: +32 9 33 13844

24 Date of submission: sept 26<sup>th</sup> 2019

25 Number of Figures:3 in colour

26 Word count: 6126

27

28

29

## 30 The use of mutants and inhibitors to study sterol biosynthesis in 31 plants

32

33 Kjell De Vriese, Jacob Pollier, Alain Goossens, Tom Beeckman, Steffen Vanneste

34

### 35 **ABSTRACT**

36 Sterols are very well known for their important roles in membranes and signaling in eukaryotes.

37 Plants stand out among eukaryotes by the large variety of sterols that they can produce, and

38 employing them across a wide spectrum of physiological processes. Therefore, it is critical to

39 understand the wiring of the biosynthetic pathways by which plants generate these distinct

40 sterols, to allow manipulating them and dissect their precise physiological roles. Many

41 enzymatic steps show a deep evolutionary conservation, while others are executed by

42 completely different enzymes. Here, we review the complexity and variation of the biosynthetic

43 routes of the most abundant phytosterols in the green lineage and how different enzymes in

44 these pathways are conserved and diverged from humans, yeast and even bacteria. Based on

45 their evolutionary conservation we discuss the use of human and yeast sterol biosynthesis

46 inhibitors in plants, as an argument for the development of plant-tailored inhibitors of sterol

47 biosynthesis.

48

49

50

51

52

53

54

55

## 56 Introduction

57 Sterols are a class of triterpenoid lipids that consist of a hydrated phenanthrene group  
58 and a cyclopentane ring that have been a topic of great interest for researchers for many  
59 decades due to their essential physiological roles in eukaryotic organisms (Benveniste, 2004;  
60 Hartmann, 1998).

61 For instance, the sterol composition in membranes has a crucial impact on membrane  
62 fluidity and transmembrane export and import processes, and some sterols can even act as  
63 second messengers or signaling molecules during developmental and cellular signaling  
64 processes. The importance of sterols for eukaryotic organisms is even more apparent when  
65 looking from an evolutionary point of view, since the occurrence of sterol biosynthesis is thought  
66 to be a key evolutionary step in the advent of eukaryotic life (Galea and Brown, 2009).

67 Indeed, the ancient rise in atmospheric O<sub>2</sub> levels to the current 21% O<sub>2</sub> not only drove  
68 the evolution of the earliest eukaryotic single-cell organisms, it also allowed for the occurrence  
69 of sterol biosynthesis pathways, which require O<sub>2</sub> (Galea and Brown, 2009; Mouritsen, 2005).  
70 This is contrasted by the occurrence of hopanoids in prokaryotes, which are ring-structured  
71 molecules that look similar to sterols, but that do not require O<sub>2</sub> for their biosynthesis and lack a  
72 3β-hydroxyl group, but exert analogous functions in the membranes as cholesterol (Berry *et al.*,  
73 1993; Mangiarotti *et al.*, 2019; Saenz *et al.*, 2015). Intriguingly, the advent of sterol biosynthesis  
74 may also have acted as an early defense mechanism protecting against oxidative damage in  
75 these primitive eukaryotes, since sterols have been shown to function as a primitive cellular  
76 defense against O<sub>2</sub> and reactive oxygen species (ROS) and are able to regulate cellular and  
77 organellar O<sub>2</sub> entry (Galea and Brown, 2009). It is thus possible that primitive eukaryotes  
78 evolved sterols as an adaptive response to the rising atmospheric O<sub>2</sub> levels, instead of just a  
79 consequence of it like previously assumed. Notably, some bacteria also produce sterols,  
80 presumably due to horizontal gene transfer (Bode *et al.*, 2003; Rivas-Marin *et al.*, 2019).

81           While sterols occur in all eukaryotic organisms, the types and amounts of sterols varies  
82 considerably between the different kingdoms. For instance, cholesterol is the major sterol  
83 produced in animals, whereas fungi mainly produce ergosterol. Plants, on the other hand,  
84 produce a wide variety of sterols (or phytosterols), with over 200 kinds known to date  
85 (Benveniste, 2004; Guo *et al.*, 1995; Schaller, 2004). Within the phytosterols, campesterol,  
86 stigmasterol and  $\beta$ -sitosterol make up the predominant molecules of the sterol profile in plants  
87 (Benveniste, 2004; Hartmann, 1998): e.g. 64% campesterol, 6% stigmasterol and 11%  $\beta$ -  
88 sitosterol in *Arabidopsis* (Benveniste, 2004; Schaeffer *et al.*, 2001). These three phytosterols  
89 have either a methyl group (campesterol) or an ethyl group ( $\beta$ -sitosterol and stigmasterol) on  
90 their C-24 position, and thus are also called 24-methylsterols and 24-ethylsterols, respectively  
91 (Schaller *et al.*, 1998). The balance between 24-methylsterols and 24-ethylsterols differs  
92 between plant species and is highly regulated, since their ratio has an important effect on  
93 several cellular processes (Schaller, 2003). For instance, reproductive organs such as flowers  
94 and seedpods are negatively affected by moderate changes in the campesterol/ $\beta$ -sitosterol  
95 ratio, while more severe changes in the campesterol/ $\beta$ -sitosterol ratio have no significant effect  
96 on stem elongation (Schaller, 2003).

97           The main function of phytosterols is the regulation of the fluidity and permeability of  
98 membranes (Schaller, 2003). They achieve this by interacting with the saturated alkyl chains of  
99 the phospho- and sphingolipids that make up the membrane bilayers, thus limiting their mobility  
100 and permeability depending on the type and amount of sterols (Hartmann, 1998). While all of  
101 the phytosterols are able to regulate membrane fluidity and permeability, their efficiency in doing  
102 so varies (Hartmann, 1998; Schuler *et al.*, 1990; Schuler *et al.*, 1991). For instance, cholesterol  
103 has the largest stabilizing effect on membranes, followed by campesterol,  $\beta$ -sitosterol, and  
104 stigmasterol (Grunwald, 1971; Hodzic *et al.*, 2008). Therefore, changes in the membrane sterol  
105 composition have an effect on the membrane permeability and function (Valitova *et al.*, 2010).

106 While phytosterols are mainly present in the PM, small amounts of them have also been found  
107 in membranes of the ER (Hartmann and Benveniste, 1987), mitochondria (Meance *et al.*, 1976),  
108 vacuole (Yoshida and Uemura, 1986) and chloroplasts (Hartmann and Benveniste, 1987).  
109 Another function in membranes to which phytosterols contribute is the formation of so-called  
110 “lipid rafts”. These lipid rafts are small, dynamic membrane domains rich in phytosterols and  
111 sphingolipids, in which certain enzymes and signaling complexes are gathered (Laloi *et al.*,  
112 2007; Malinsky *et al.*, 2013; Simon-Plas *et al.*, 2011; Simons and van Meer, 1988). Lipid rafts  
113 have been successfully identified and isolated in several plant species and detailed analyses of  
114 their composition confirmed the presence of the main phytosterols campesterol,  $\beta$ -sitosterol and  
115 stigmasterol, as well as other sterols, sterol glycosides and sphingolipids (Cacas *et al.*, 2012;  
116 Mongrand *et al.*, 2004; Simon-Plas *et al.*, 2011). Consequently, the phytosterol content of  
117 membranes indirectly affects enzyme activity, signal transduction, ion transport, and protein-  
118 protein and protein-lipid interactions that take place in and over these membranes  
119 (Grandmougin-Ferjani *et al.*, 1997; Schaller, 2003).

120 This is evidenced by the wide range of severe phenotypes that were reported for  
121 mutants defective in sterol biosynthesis. Phenotypes of such mutants include extreme dwarfism  
122 and disturbances in embryogenesis, vascularization, fertility, cell differentiation and proliferation,  
123 depending on the sterol biosynthesis step that is disturbed (Azpiroz *et al.*, 1998; Catterou *et al.*,  
124 2001; Clouse, 2000; Guo *et al.*, 1995; He *et al.*, 2000; Piironen *et al.*, 2000; Schaller, 2003).  
125 Currently, the origin of these sterol mutant phenotypes is poorly understood. Some can be  
126 explained by defects in auxin transport (Men *et al.*, 2008; Pan *et al.*, 2009; Titapiwatanakun *et al.*,  
127 2009; Willemsen *et al.*, 2003; Yang *et al.*, 2013) or ethylene signaling (Souter *et al.*, 2002),  
128 whereas others derive from defects in brassinosteroid signaling as campesterol serves as a  
129 biosynthetic precursor of the brassinosteroid brassinolide. Furthermore, there are indications  
130 that phytosterols can act as signaling/regulatory molecules during plant growth and

131 development (Fujioka and Sakurai, 1997; Guo *et al.*, 1995; Lindsey *et al.*, 2003; Vriet *et al.*,  
132 2013).

133 In conclusion, phytosterols not only are vital structural components of membranes, they  
134 also play key roles during plant growth and development. Therefore, the large variety of plant  
135 sterols allows plants to adapt to constantly changing environmental conditions.

136

### 137 **Conservation and divergence in the early sterol biosynthesis pathway**

138 The initial pathway from which all triterpenes (including phytosterols, lanosterol and  
139 cholesterol) are derived is called the mevalonate (MVA) pathway, which is largely conserved  
140 across eukaryotes and archaea (Buhaescu and Izzedine, 2007; Lombard and Moreira, 2011)  
141 (Fig. 1). The end products of the MVA pathway are isopentenyl pyrophosphate (IPP) and  
142 dimethylallyl pyrophosphate (DMAPP), which form the primary building blocks of all isoprenoids  
143 (Goldstein and Brown, 1990).

144 The MVA pathway starts with the condensation of two acetyl-CoA molecules into  
145 acetoacetyl-CoA by acetoacetyl-CoA thiolase. An additional condensation in the next step  
146 catalyzed by HMG-CoA synthase (HMGS) results in the formation of 3-hydroxy-3-  
147 methylglutaryl-CoA (HMG-CoA). Subsequent reduction of HMG-CoA by HMG-CoA reductase  
148 (HMGR) leads to the production of mevalonate. In contrast to humans, plants often have  
149 multiple HMGR isoforms in their genomes. For instance, the *Arabidopsis* genome contains two  
150 HMGR genes that encode for three HMGR isoforms, of which HMG1 is most abundantly  
151 expressed (Enjuto *et al.*, 1994; Enjuto *et al.*, 1995). Consistent with its biochemical role in the  
152 mevalonate pathway, the pleiotropic *hmg1* phenotype can be rescued by exogenous application  
153 of squalene (Suzuki *et al.*, 2004).

154 In the last steps of the eukaryotic MVA pathway, MVA undergoes two phosphorylations  
155 at its 5-OH position (catalyzed by mevalonate-5-kinase (MK) and phosphomevalonate kinase  
156 (PMK)), followed by a decarboxylation (catalyzed by mevalonate 5-diphosphate decarboxylase  
157 (MDD)), resulting in IPP. This IPP, together with its derivative DMAPP that is synthesized by  
158 IPP isomerase (IDI), form the starting molecules of the pathways leading to the production of a  
159 large variety of isoprenoids (Goldstein and Brown, 1990). Archaea use a modified MVA pathway  
160 in comparison to eukaryotes, in which the last three enzymes have been replaced by other  
161 enzymes (Boucher *et al.*, 2004).

162 Interestingly, unlike animals and fungi, plants also have the ability to produce IPP and DMAPP  
163 via an alternative pathway: the methylerythritol phosphate (MEP) or non-mevalonate pathway  
164 (Banerjee and Sharkey, 2014; Chappell, 2002), which takes place in the plastids and is mostly  
165 used for the biosynthesis of various mono-, di- and tetraterpenoids (Laule *et al.*, 2003; Zhao *et*  
166 *al.*, 2013) (Fig. 1). The MEP pathway is the main pathway for IPP and DMAPP biosynthesis in  
167 bacteria, with some exceptions (Lombard and Moreira, 2011), and is obtained by plants during  
168 the endosymbiosis event with cyanobacteria that originated the plastids (Lange *et al.*, 2000).

169 On the other hand, the IPP and DMAPP produced by the cytosolic MVA pathway are mainly  
170 used for the production of phytosterols, triterpenoids and sesquiterpenoids. Interestingly, many  
171 green algae species do not possess the MVA pathway and are solely reliant on the MEP  
172 pathway for isoprenoid biosynthesis (Lohr *et al.*, 2012). Notably, there are indications of  
173 crosstalk between the cytosolic MVA and plastidial MEP pathways in plants (Mendoza-  
174 Poudereux *et al.*, 2015; Tansey and Shechter, 2001). Furthermore, it was recently shown that  
175 plants express a functional homolog of the isopentenyl phosphate kinase (IPK) that was  
176 originally identified in archaeobacteria as part of their modified MVA pathway (Dellas and Noel,  
177 2010; Henry *et al.*, 2015). This enzyme catalyzes the phosphorylation of isopentenyl phosphate  
178 (IP) and dimethylallyl phosphate (DMAP) into IPP and DMAPP, respectively, thus increasing



179 their availability for terpenoid production (Henry *et al.*, 2015; Henry *et al.*, 2018). Interestingly,  
180 IPP can be dephosphorylated back to IP by a subset of Nudix superfamily hydrolases (Henry et  
181 al., 2018). Together, these findings illustrate the highly complex metabolic regulation of IPP and  
182 DMAPP levels for terpenoid biosynthesis in plants.

183 Subsequently, in the cytosol, farnesyl pyrophosphate (FPP) is formed by two sequential  
184 condensation reactions, in which two IPP molecules are added to DMAPP. These condensation  
185 reactions are catalyzed by farnesyl pyrophosphate synthase (FPPS) (Kulkarni *et al.*, 2013). In  
186 the plastidial MEP pathway, on the other hand, FPP is synthesized in two steps, in which IPP  
187 and DMAPP are first converted to GPP by GPPS followed by the formation of FPP from GPP  
188 and IPP by a plastidial FPPS (Manzano *et al.*, 2016). In the cytosol, FPP can either enter the  
189 sesquiterpene biosynthesis pathway, or be further converted to squalene, a C-30 molecule  
190 which is a condensation of two FPP units catalyzed by squalene synthase (SQS) (Tansey and  
191 Shechter, 2001). Squalene is produced via this pathway in both pro- and eukaryotes, where it is  
192 the universal precursor of hopanoids and steroids, respectively. In plants, animals and fungi,  
193 squalene is further converted to 2,3-oxidosqualene by squalene epoxidase (SQE; see further)  
194 (Thimmappa *et al.*, 2014).

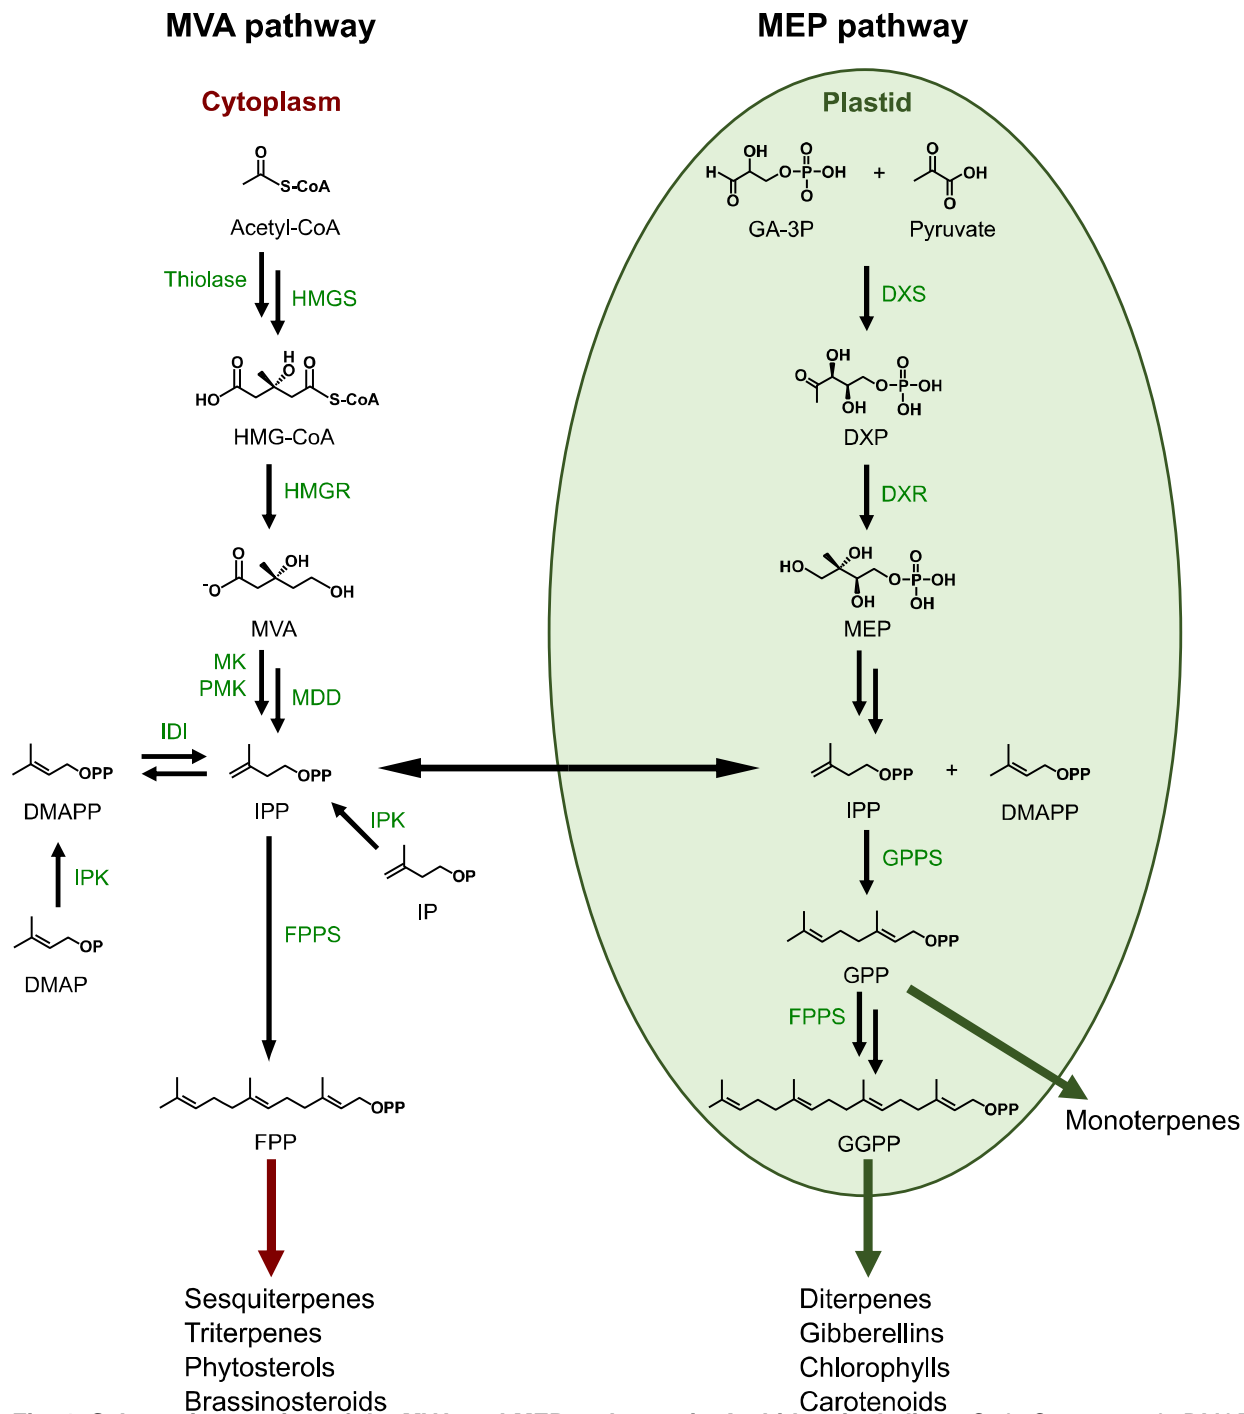

195  
196 **Fig. 1. Schematic overview of the MVA and MEP pathways in *Arabidopsis thaliana*.** CoA, Coenzyme A; DMAP, dimethylallyl phosphate; DMAPP, dimethylallyl pyrophosphate; DXP, 1-deoxy-D-xylulose 5-phosphate; DXR, DXP reductoisomerase; DXS, DXP synthase; FPP, farnesyl pyrophosphate; FPPS, farnesyl pyrophosphate synthase; GA-3P, glyceraldehyde 3-phosphate; GGPP, geranylgeranyl pyrophosphate; GPP, geranyl pyrophosphate; GPPS, geranyl pyrophosphate synthase; HMG, 3-Hydroxy-3-methylglutaryl; HMGR, HMG-CoA reductase; HMGS, HMG-CoA synthase; IDI, IPP isomerase; IPK, isopentenyl phosphate kinase; IP, isopentenyl phosphate; IPP, isopentenyl pyrophosphate; MDD, mevalonate 5-diphosphate decarboxylase; MEP, methylerythritol phosphate; MK, mevalonate-5-kinase; MVA, mevalonate; PMK, phosphomevalonate kinase.

204

205 **Early Phytosterol biosynthesis – 2,3-oxidosqualene as a precursor for**  
206 **phytosterols**

207 As mentioned before, the biosynthesis of sterols in eukaryotes begins with the  
208 epoxidation of squalene into 2,3-oxidosqualene by SQUALENE EPOXIDASEs (SQE)  
209 (Thimmappa *et al.*, 2014). Of three functional SQEs in *Arabidopsis* that can rescue SQE  
210 deficient yeast (Laranjeira *et al.*, 2015; Rasbery *et al.*, 2007), SQE1 seems to play the most  
211 predominant function, as a single mutant displays pleiotropic phenotypes in the root and shoot  
212 (Pose *et al.*, 2009; Rasbery *et al.*, 2007). However, these phenotypes were not due to the  
213 reduced sterol content of the mutant, but rather due to its hyperaccumulation of squalene  
214 (Doblas *et al.*, 2013). Moreover, the *sqe1* phenotypes could be explained by misregulation of  
215 ROS production (Pose *et al.*, 2009), unlike later sterol biosynthetic mutants that display  
216 misregulated ethylene production and auxin transport (See further) (Souter *et al.*, 2002; Souter  
217 *et al.*, 2004). This observation gives further credibility to the hypothesis that sterol biosynthesis  
218 may have evolved as an adaptation to oxidative stress (Galea and Brown, 2009). Furthermore,  
219 these data provide evidence for a primordial role for a conserved oxidosqualene biosynthesis  
220 pathway acting as the earliest section of the phytosterol biosynthesis pathway. However, the  
221 absence of completely predictable reductions in the total phytosterol levels upon interference  
222 with enzymes involved in oxidosqualene biosynthesis indicates an important gap in our  
223 understanding of how early phytosterol biosynthesis is regulated. Indeed, recently, an  
224 alternative SQE has been identified in the diatom *Phaeodactylum tricorutum*, that belongs to  
225 the fatty acid hydroxylase superfamily instead of to the flavoprotein monooxygenases like the  
226 conventional SQEs (Pollier *et al.*, 2019). This suggests that different enzymatic reactions in  
227 plant phytosterol biosynthesis can be mediated by a wider palette of enzymes than would be  
228 expected based on sequence homology to yeast and human sterol biosynthetic genes.

229            Depending on the plant species, there are multiple cyclization pathways that convert 2,3-  
230    oxidosqualene into different cyclic triterpene derivatives, based on the oxidosqualene cyclases  
231    (OSCs) that are present. These OSCs evolved from bacterial squalene/hopane synthases, and  
232    include cycloartenol synthase (CAS), lanosterol synthase (LAS), thalianol synthase (THAS) and  
233     $\beta$ -amyrin synthase (bAS) (Sawai *et al.*, 2006; Thimmappa *et al.*, 2014). The most prominent of  
234    these pathways starts with the cyclization of 2,3-oxidosqualene into cycloartenol, which is  
235    catalyzed by the enzyme cycloartenol synthase 1 (CAS1) in *Arabidopsis* (Gas-Pascual *et al.*,  
236    2014; Rees *et al.*, 1969; Thimmappa *et al.*, 2014). This pathway mainly produces the three  
237    major phytosterols as end-products, namely campesterol,  $\beta$ -sitosterol and stigmasterol, via a  
238    complex series of enzyme-catalyzed conversions. Interestingly, the bacterium *Stigmatella*  
239    *aurantiaca* also produces cycloartenol via a CAS enzyme that is similar to that of plants (Bode  
240    *et al.*, 2003), and a squalene monooxygenase and an OSC were found to be essential for  
241    lanosterol biosynthesis in the bacterium *Gemmata obscuriglobus* (Rivas-Marin *et al.*, 2019).

242            Cycloartenol is first converted to 24-methylenecycloartenol by the addition of a methyl-  
243    group at the C-24 position by C-24 sterol methyltransferase 1 (SMT1), which is a key regulatory  
244    step of phytosterol biosynthesis (Neelakandan *et al.*, 2009; Shi *et al.*, 1996). In the next step,  
245    removal of a methyl group from the C-4 position of 24-methylenecycloartenol leads to in  
246    cycloeucalenol. In *Arabidopsis*, this step is catalyzed by three members of the sterol-4 $\alpha$ -methyl  
247    oxidase 1 (SMO1) enzyme family (Darnet and Rahier, 2004). The opening of the cyclopropane  
248    ring of cycloeucalenol by cycloeucalenol cycloisomerase (CPI1) subsequently leads to the  
249    production of obtusifoliol (Benveniste, 2002). Obtusifoliol then undergoes demethylation of its C-  
250    14 position, which results in the formation of 4 $\alpha$ -methyl-5 $\alpha$ -ergosta-8,14,24(28)-trien-3 $\beta$ -ol  
251    (Rahier and Taton, 1986). This reaction is catalyzed by obtusifoliol 14 $\alpha$ -demethylase (CYP51G1  
252    in *Arabidopsis*), a cytochrome P450 enzyme. Next, 4 $\alpha$ -methyl-5 $\alpha$ -ergosta-8,14,24(28)-trien-3 $\beta$ -  
253    ol is converted to 4 $\alpha$ -methylfecosterol by the sterol C-14 reductase FACKEL (FK). In the

254 following step, the C-7 double bond of 4 $\alpha$ -methylfecosterol undergoes a reduction catalyzed by  
255 the C-8,7 sterol isomerase HYDRA1 (HYD1) (Souter *et al.*, 2002), which leads to the formation  
256 of 24-methylenelophenol.

257 This part of the phytosterol pathway in Arabidopsis is encoded by single genes and the  
258 corresponding mutants often display strong phenotypes, including *cpi*, *smt1*, *cyp51*, *hyd1* and  
259 *fk*. The *cpi* mutant is characterized by increased levels of cycloeucaenol and its derivatives, and  
260 has severe defects in its growth and development (Men *et al.*, 2008). The *smt1*, *hyd1* and *fk*  
261 mutants have reduced phytosterol and BR levels, and are severely impaired in embryogenesis,  
262 cell polarity, root growth, gravitropism and vascular development (Diener *et al.*, 2000; Schrick *et*  
263 *al.*, 2000; Souter *et al.*, 2002; Topping *et al.*, 1997; Willemsen *et al.*, 2003). The abnormal  
264 vascular development phenotype of the *hyd1* and *fk* mutants could be partially rescued by  
265 crossing these mutants with auxin-resistant mutants, indicating that the *hyd1* and *fk* mutants  
266 may have disturbed auxin signaling or transport (Souter *et al.*, 2002). Similarly, the abnormal  
267 root phenotype in *hyd1* and *fk* could be rescued by crossing these mutants with a dominant  
268 ethylene-resistant mutant, suggesting they also have disturbed ethylene signaling (Souter *et al.*,  
269 2002). Recently, tissue-specific complementation of the *hyd1* mutant suggests that many of its  
270 phenotypes can be explained by defective patterning of PIN auxin transporters, and associated  
271 defects in auxin transport (Diener *et al.*, 2000). Interestingly, the *smt1* mutant is hypersensitive  
272 to Ca<sup>2+</sup> ions, since lowering the Ca<sup>2+</sup> concentration in the growth medium of this mutant resulted  
273 in improved root growth, probably due to alterations in membrane permeability (Diener *et al.*,  
274 2000).

275  
276  
277

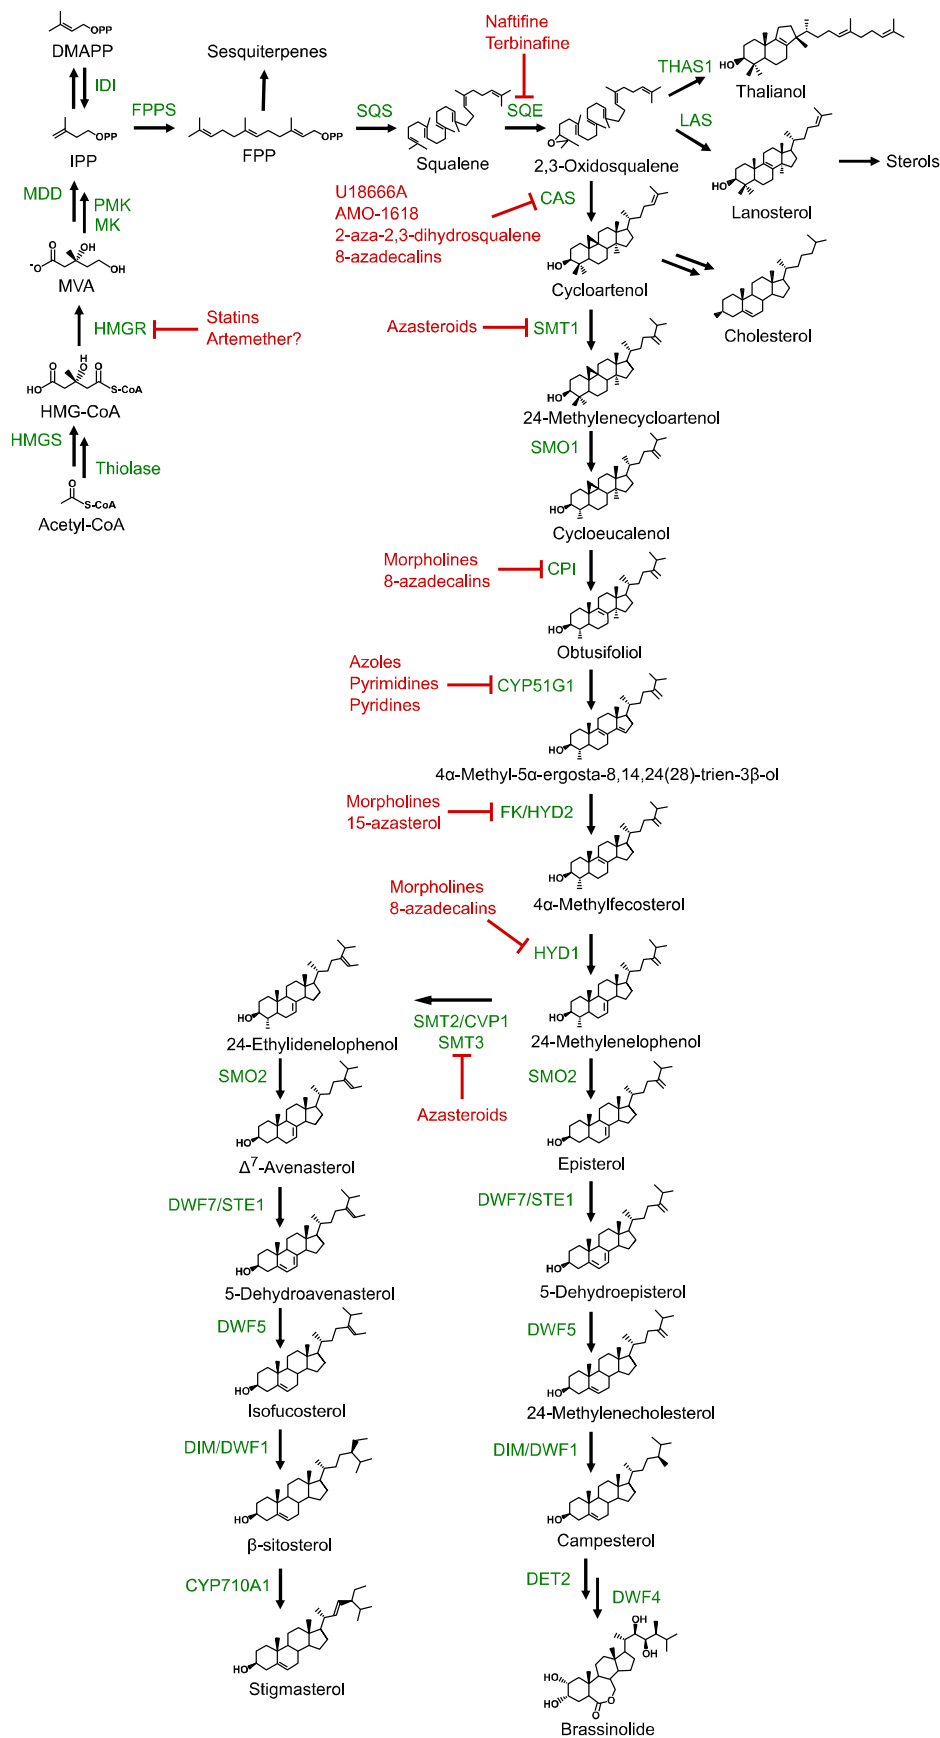

278 **Fig. 2. Schematic overview of the main sterol biosynthesis pathway in *Arabidopsis thaliana* and putative**  
279 **target sites of inhibitors.** CAS, cycloartenol synthase; CoA, Coenzyme A; CPI, cycloeucaenol cycloisomerase;  
280 CVP1, cotyledon vascular pattern 1; CYP51G1, cytochrome P450 51G1; CYP710A1, cytochrome P450 710A1;  
281 DET2, DEETIOLATED2; DIM, DIMINUTO; DMAPP, dimethylallyl pyrophosphate; DWF1/5/7, DWARF1/5/7; FK,  
282 FACKEL; FPP, farnesyl pyrophosphate; FPPS, farnesyl pyrophosphate synthase; HMG, 3-Hydroxy-3-methylglutaryl;  
283 HMGR, HMG-CoA reductase; HMGS, HMG-CoA synthase; HYD, HYDRA; IDI, IPP isomerase; IPP, isopentenyl  
284 pyrophosphate; LAS, lanosterol synthase; MDD, mevalonate 5-diphosphate decarboxylase; MK, mevalonate-5-  
285 kinase; MVA, mevalonate; PMK, phosphomevalonate kinase; SMO, sterol-4 $\alpha$ -methyl oxidase; SMT1/2/3, C-24 sterol  
286 methyltransferase 1/2/3; SQE, squalene epoxidase; SQS, squalene synthase; STE1, STEROL1; THAS1, thalianol  
287 synthase.  
288

### 289 **Phytosterol biosynthesis – parallel branches for stigmasterol and campesterol**

290 From 24-methylenelophenol onwards, the pathway bifurcates via two separate  
291 branches, eventually resulting in either 24-ethylsterols ( $\beta$ -sitosterol and stigmasterol) or 24-  
292 methylsterols (campesterol) as end-products, respectively. Campesterol can subsequently be  
293 used as a precursor for brassinosteroid biosynthesis.

294 The 24-ethylsterol branch pathway begins with a second methylation of the C-24  
295 position of 24-methylenelophenol by the enzymes C-24 sterol methyltransferase 2/cotyledon  
296 vascular pattern 1 (SMT2/CVP1) and C-24 sterol methyltransferase 3 (SMT3), which results in  
297 24-ethylidenelophenol (Bouvier-Nave *et al.*, 1998; Carland *et al.*, 2010). Like with SMT1, the  
298 reaction catalyzed by SMT2/CVP1 is an important regulatory step in sterol biosynthesis, since it  
299 determines the ratio of 24-methyl- and 24-ethylsterols, which affects several developmental  
300 processes in plants (Bouvier-Nave *et al.*, 1997; Carland *et al.*, 2002; Schaeffer *et al.*, 2001).  
301 Interestingly, it is thought that SMT2/CVP1 is also able to catalyze the primary C-24 methylation  
302 catalyzed by SMT1, albeit to a lesser extent (Schaeffer *et al.*, 2001). A following double  
303 demethylation of 24-ethylidenelophenol by sterol-4 $\alpha$ -methyl oxidase 2 (SMO2) results in the  
304 formation of  $\Delta^7$ -avenasterol (Darnet and Rahier, 2004), which is subsequently converted to 5-  
305 dehydroavenasterol by the  $\Delta^7$ -sterol-C5-desaturase DWARF7/STEROL1 (DWF7/STE1) (Choe  
306 *et al.*, 1999b; Gachotte *et al.*, 1996). Next, the sterol  $\Delta^7$ -reductase DWARF5 (DWF5) converts

307 this 5-dehydroavenasterol into isofucosterol (Choe *et al.*, 2000). Finally, a C-24 reduction of  
308 isofucosterol by the  $\Delta^{24}$ -sterol- $\Delta^{24}$ -reductase DIMINUTO/DWARF1 (DIM/DWF1) leads to the  
309 generation of  $\beta$ -sitosterol (Choe *et al.*, 1999a), which can then undergo a further C-22  
310 desaturation by the C-22 sterol desaturase CYP710A1, resulting in the end-product of this  
311 pathway: stigmasterol (Morikawa *et al.*, 2006). However, not many details are known about this  
312 desaturation reaction in higher plants. Interestingly, in Arabidopsis, a second CYP710 enzyme  
313 (CYP710A2) is also able to produce stigmasterol from  $\beta$ -sitosterol, and can also produce  
314 brassicasterol from 24-epi-campesterol (Benveniste, 2002; Morikawa *et al.*, 2006).

315         The 24-methylsterol branch pathway starting from 24-methylenelophenol that eventually  
316 leads to the production of campesterol is similar to the first one and mostly uses the same  
317 enzymes. However, instead of first being methylated at the C-24 position by SMT2/CVP1 and  
318 SMT3 during the first step of this branched pathway, 24-methylenelophenol is directly  
319 demethylated by SMO2. This causes 24-methylenelophenol to be converted to episterol (Darnet  
320 and Rahier, 2004). The rest of the pathway consists of the same steps as the first branched  
321 pathway. First STE1 causes a desaturation of the C-5 position of episterol, which results in 5-  
322 dehydroepisterol. This is followed by a reduction of its C-7 position by DWF5, leading to 24-  
323 methylenecholesterol (Choe *et al.*, 2000). Finally, a reduction of the C-24 double bond of 24-  
324 methylenecholesterol by DIM/DWF1 yields the end-product of this pathway: campesterol.  
325 Besides its function as a structural phytosterol in membranes, campesterol also acts as a  
326 precursor for the brassinosteroid biosynthesis pathway (Choe *et al.*, 1999a; Clouse, 2011). For  
327 details about brassinosteroid biosynthesis, we refer to dedicated reviews (Choe *et al.*, 1999a;  
328 Clouse, 2011).

329         The *smt2/cvp1* mutant has increased campesterol levels and reduced  $\beta$ -sitosterol levels,  
330 and is characterized by moderate developmental defects, such as disturbed venation patterns in  
331 its cotyledons, serrated floral organs and a reduced stature (Carland *et al.*, 2010; Carland *et al.*,



2002). Unlike the early sterol biosynthesis mutants *smt1*, *hyd1* and *fk*, more downstream sterol biosynthesis mutants such as *smt2/cvp1*, *dim/dwf1*, *dwf5* and *dwf7/ste1* show no defects in embryogenesis. The *smt2/cvp1* mutant is smaller than the wild type, but it doesn't demonstrate extreme dwarfism (Carland *et al.*, 2002). Although *dim/dwf1*, *dwf5* and *dwf7/ste1* affect successive steps in the conversion of episterol to campesterol, and  $\Delta^7$ -avenasterol to  $\beta$ -sitosterol (Choe *et al.*, 1999a; Choe *et al.*, 1999b; Clouse, 2002), the phenotypes of these mutants resemble those of brassinosteroid-deficient mutants, reflecting the importance of campesterol as a precursor of the most biologically active brassinosteroid, brassinolide. However, while these mutants are significantly smaller than wild-type plants, they don't display the extreme dwarfism that is typical of BR biosynthesis mutants. Furthermore, the sterol profile of these mutants is vastly disturbed, with *dwf7/ste1* being almost completely devoid of campesterol (Choe *et al.*, 1999b; Choe *et al.*, 2000). These macroscopic phenotypes can be partially rescued by external application of BRs (Choe *et al.*, 1999a; Choe *et al.*, 1999b; Choe *et al.*, 2000; Klahre *et al.*, 1998; Schaller, 2003), demonstrating that they are largely caused by an impairment in downstream BR synthesis, rather than a direct effect of campesterol deficiency. However, since DIM/DWF1, DWF5 and DWF7/STE1 also catalyze the conversion steps of  $\Delta^7$ -avenasterol to  $\beta$ -sitosterol (Fig. 2), their respective mutants are not only deficient in campesterol, but also in  $\beta$ -sitosterol and stigmasterol, suggesting that the resulting defects in membrane integrity are at least partially responsible for the observed phenotypes of these mutants. This is presumably the case for the observed fertility defects, since BR application does not restore fertility in these mutants, suggesting that phytosterols play an important role during the plant reproduction that is independent from BRs (Schaller, 2004).

Furthermore, unlike *dim/dwf1*, *dwf5* and *dwf7/ste1*, the phenotypes of *smt2/cvp1* and the early sterol biosynthesis mutants *smt1*, *cpi*, *fk* and *hyd1* cannot be rescued by BR treatment (Carland *et al.*, 2002; Diener *et al.*, 2000; Schrick *et al.*, 2000). Since these phenotypes are

357 independent from the downstream BR pathway, it is possible that early synthesized sterols  
358 (sterol biosynthesis intermediates) can act as signaling molecules themselves, similar to what  
359 has been shown for cholesterol in animals (Edwards and Ericsson, 1999; Farese and Herz,  
360 1998; Vriet *et al.*, 2013). For example, accumulation of the sterol biosynthesis intermediate 4-  
361 carboxy-4-methyl-24-methylenecycloartanol (CMMC), which accumulated in a mutant defective  
362 in tethering the sterol C4-demethylation complex, interferes with auxin transport (Edwards and  
363 Ericsson, 1999; Farese and Herz, 1998; Vriet *et al.*, 2013). Also of note is that the sterol  
364 biosynthesis pathways are relatively conserved between Eukaryotes, with diatoms and yeast  
365 using mostly similar or identical enzymes as the higher plants, albeit sometimes in a different  
366 order, which explains the difference in end products obtained (e.g. ergosterol in yeast and  
367 brassicasterol/campesterol in diatoms) (Fabris *et al.*, 2014). Overall, these mutants of early and  
368 late steps of the sterol biosynthesis pathway have been excellent tools in aiding our  
369 understanding of plant sterol biosynthesis and the role of sterols in plant growth and  
370 development.

371

## 372 **Cholesterol biosynthesis in plants**

373 The major sterols in plants are  $\beta$ -sitosterol, campesterol and stigmasterol, but many  
374 plants also produce cholesterol to some degree (Behrman and Gopalan, 2005). While the  
375 cholesterol levels in plants are usually low (100 - 1000 times lower compared to animals),  
376 cholesterol makes up a significant portion of the sterol content in some plant species (e.g. more  
377 than 10% in *Solanaceae*) (Sonawane *et al.*, 2016). Furthermore, it has been shown to serve  
378 several functions in various plant species, including as membrane component, leaf surface lipid,  
379 and precursor for several plant metabolites such as steroidal glycoalkaloids (SGAs) and  
380 phytoecdysteroids (Cardenas *et al.*, 2015; Dinan, 2001; Japelt and Jakobsen, 2013; Milner *et*  
381 *al.*, 2011).

382 Cholesterol is the major sterol in animals, in which the cholesterol biosynthesis pathway  
383 has been extensively studied and characterized (Nes, 2011), while cholesterol biosynthesis in  
384 plants is still not fully understood. Recently, several genes and enzymes involved in cholesterol  
385 biosynthesis in tomato plants were identified by analyzing transcript and protein co-expression  
386 data, as well as a combination of functional assays (Sonawane *et al.*, 2016). These data  
387 demonstrated the involvement of 12 enzymes in the tomato cholesterol biosynthesis pathway, of  
388 which several also function in the phytosterol biosynthesis pathway to catalyze highly related  
389 enzymatic conversions. Furthermore, the other enzymes that are specific for the cholesterol  
390 biosynthesis pathway seem to have evolved through gene duplication and divergence from  
391 phytosterol biosynthetic enzymes (Sonawane *et al.*, 2016). Unlike animals, cholesterol  
392 biosynthesis in plants does not seem to start from 2,3-oxidosqualene cyclization into lanosterol  
393 by LAS (Sonawane *et al.*, 2016). Instead, the OSC involved is CAS, after which cycloartenol is  
394 not only used for phytosterol biosynthesis, but also cholesterol biosynthesis (Fig. 2). Indeed, in  
395 tomato and potato plants it was shown that sterol side chain reductase 2 (SSR2) is a key  
396 enzyme in cholesterol biosynthesis that catalyzes the conversion of cycloartenol into  
397 cycloartanol, the first committed step in cholesterol biosynthesis (Sonawane *et al.*, 2016).  
398 However, while LAS probably doesn't contribute significantly to cholesterol biosynthesis, LAS  
399 genes were identified in several plant species, including Arabidopsis (Kolesnikova *et al.*, 2006;  
400 Sawai *et al.*, 2006; Suzuki *et al.*, 2006). Furthermore, it was shown that LAS1 overexpression in  
401 Arabidopsis significantly increases the phytosterol levels while *las1* knockout mutants do not  
402 have phytosterols derived from lanosterol, indicating that there exists an alternative phytosterol  
403 biosynthesis pathway that is dependent on LAS (Ohyama *et al.*, 2009). The existence of  
404 alternative pathways contributing to phytosterol biosynthesis could explain why phytosterol  
405 levels in *cas1* mutants remain unchanged, despite a strong defect in cycloartenol synthase  
406 activity as indicated by the accumulation of 2,3-oxidosqualene (Babiychuk *et al.*, 2008).

407

## 408 **Chemical inhibitors of key steps in the plant sterol biosynthesis pathway**

409        Besides mutants, another way in which sterol biosynthesis can be disrupted is through  
410 the action of chemical inhibitors that target specific steps of the sterol biosynthesis pathway  
411 (Fig. 2, Fig. 3). Indeed, sterol biosynthesis inhibitors have proven to be effective tools to probe  
412 and investigate sterol biosynthesis pathways across the different kingdoms. Many of the  
413 currently used sterol biosynthesis inhibitors have seen commercial use as fungicides and  
414 antimycotic drugs, and some can even be used to regulate plant growth (Lenton, 1987; Leroux  
415 *et al.*, 2008). Since the sterol biosynthesis pathways of plants, animals and yeast share many  
416 similar conversion steps that are catalyzed by semi-conserved enzymes, several of the most  
417 used sterol biosynthesis inhibitors function across kingdoms (Ator *et al.*, 1992). Nevertheless,  
418 there still exist clear differences in the sterol biosynthesis pathways between the kingdoms,  
419 leading to different sensitivities and specificities of sterol biosynthesis inhibitors (Nes, 2011).  
420 The following paragraphs will go into more detail about some of the most active and most used  
421 sterol biosynthesis inhibitors in plants, and their presumed targets. The compounds discussed  
422 and their presumed targets in Arabidopsis are indicated in Fig. 2. The numbers in brackets  
423 behind the discussed compounds correlate to their numbers in Fig. 3.

424        Statins potently inhibit human HMGR activity by occupying the HMG-CoA binding site  
425 (Istvan and Deisenhofer, 2001). Because HMGR is a rate-limiting enzyme in MVA biosynthesis,  
426 statin-based medication is widely used to lower cholesterol levels (reviewed in (Davies *et al.*,  
427 2016). In several plant species, statins, such as lovastatin (**1**) (or mevilonin) and mevastatin (**2**)  
428 (or compactin), reduce root growth and sterol biosynthesis (Bach and Lichtenthaler, 1982, 1987;  
429 Kim *et al.*, 2014; Soto *et al.*, 2011), demonstrating that statins can also be used as HMGR  
430 inhibitors in plant sterol research.

431 Two allylamine fungicides, namely naftifine **(3)** and terbinafine **(4)**, are potent non-  
432 competitive SQE inhibitors in fungi (Birnbaum, 1990; Ryder, 1991; Nowosielski et al., 2011).  
433 Docking analyses on modelled SQE suggest that terbinafine binding causes a conformational  
434 change that blocks one mode of substrate binding, while changing the geometry of another.  
435 (Nowosielski *et al.*, 2011). Although plant SQEs can complement yeast SQE deficient mutants  
436 (Rasbery et al., 2007), they are not highly sensitive to these inhibitors (Yates et al., 1991, 1992;  
437 Wentzinger et al., 2002). This is not surprising as single amino acid substitutions in yeast SQE  
438 are sufficient to confer terbinafine resistance (Leber *et al.*, 2003). Yet, the *sqe1-5* mutant is  
439 hypersensitive to terbinafine (Pose et al., 2009). On the other hand, some organisms such as  
440 the diatom *P. tricornutum* are completely insensitive to terbinafine as they use alternative SQEs  
441 (Fabris et al., 2014; Pollier et al., 2019).

442 Squalostatins (also called zaragozic acids), are highly potent and specific competitive  
443 inhibitors of rat SQS, with apparent subnanomolar *K<sub>i</sub>* values (Baxter et al., 1992; Bergstrom et  
444 al., 1993). Also in plants, squalostatins are highly potent, as they inhibit SQS in BY-2 cell  
445 suspensions with an *IC<sub>50</sub>* value of 5.5 nM, possibly via an irreversible inhibition mechanism  
446 (Hartmann et al., 2000; Wentzinger et al., 2002). Exogenous application of squalostatin  
447 activates transcriptional responses also seen in lovastatin-treated plants and impairs the plants  
448 fertility (Suzuki et al., 2004). The Arabidopsis genome encodes only a single functional SQS  
449 (SQS1; Busquets et al., 2008), but has not yet been subjected to mutant analysis.

450 Over the years, several compounds have been identified that inhibit OSCs to varying  
451 degrees by mimicking the carbocationic intermediates formed during the cyclization of 2,3-  
452 oxidosqualene. Some examples of OSC inhibitors that have been successfully utilized in plants  
453 are 2-aza-2,3-dihydrosqualene **(5)** (Duriatti et al., 1985; Cattel et al., 1986), U18666A **(6)**  
454 (Duriatti et al., 1985; Cattel et al., 1986) and AMO-1618 **(7)** (Douglas and Paleg, 1978, 1978,  
455 1981). Another class of OSC inhibitors are the 8-azadecalins, such as 4,4,10 $\beta$ -trimethyl-trans-

456 decal-3 $\beta$ -ol (TMD) (**8**) and its derivatives (Ruhl et al., 1989; Raveendranath et al., 1990;  
457 Hoshino et al., 1995). However, the 8-azadecalins also inhibit other enzymes besides OSCs  
458 (such as cyclopropyl sterol isomerase, C-14 sterol reductase and C-8,7 sterol isomerase), thus  
459 potentially leading to off-target effects.

460 In Arabidopsis, the C-24 sterol methyltransferase SMT1 catalyzes the transfer of a  
461 methyl group from S-adenosyl-L-methionine to cycloartenol (Benveniste, 1986; Bouvier-Nave et  
462 al., 1998; Diener et al., 2000), leading to the formation of  $\Delta^5$  C-24 alkyl sterols. Since SMT1 only  
463 occurs in plants and fungi, and not in animals, it is an interesting target for studying phytosterol  
464 biosynthesis. SMT2/CVP1 and SMT3 are mainly responsible for a second methyl addition, thus  
465 resulting in an ethyl side-chain addition on the C-24 (Schaeffer et al., 2001; Carland et al.,  
466 2010). Therefore, the regulation of the SMT enzymes determines the sterol composition in  
467 plants. Many compounds have been designed over the years to act as SMT inhibitors (Nes,  
468 2000). These inhibitors can be broadly classified in three groups: 1) substrate analogues that  
469 act as inactivators of the enzyme, 2) substrate analogues that resemble high-energy  
470 intermediates, and 3) product analogues. While these compounds are generally designed in  
471 fungal systems, some of them have been shown to inhibit SMT1 and SMT2/CVP1 in plants as  
472 well, including the azasteroid inhibitors 25-azacycloartenol (**9**) (Rahier et al., 1980; Schmitt et  
473 al., 1981; Rahier et al., 1986; Mangla and Nes, 2000), 25-azalanosterol (**10**) (Rahier et al.,  
474 1984) and 24-epiiminolanosterol (**11**) (Tal and Nes, 1987), which are carbocationic transition  
475 state analogues of the substrates of these enzymes (Rahier et al., 1984).

476 The 14 $\alpha$ -methylsterol demethylase enzyme in plants (obtusifoliol 14 $\alpha$ -demethylase)  
477 catalyzes the demethylation of obtusifoliol (Lepesheva and Waterman, 2007). This enzyme is a  
478 cytochrome P450 dependent monooxygenase (CYP51G1 in Arabidopsis) (Benveniste, 1986;  
479 Lepesheva and Waterman, 2007). In fungi and animals, the best studied and most widely used  
480 inhibitors of P450s are the azoles, which are a popular type of antifungal compounds that are

481 used for both agricultural and medical purposes (Becher and Wirsal, 2012). Two subclasses of  
482 the azoles are the imidazoles, such as clotrimazole **(12)**, oxiconazole **(13)**, ketoconazole **(14)**,  
483 imazalil (enilconazole) **(15)** and prochloraz **(16)**, and the triazoles, such as triadimenol **(17)**,  
484 voriconazole **(18)** and fluconazole **(19)**. They are nitrogen-containing heterocyclic compounds  
485 that form an effective class of fungicides by non-competitively binding to the ferric ion of the  
486 heme group of fungal CYP51, thus preventing it from binding its substrate (Rogerson et al.,  
487 1977; Warrilow et al., 2013). Despite being primarily used as fungicides, several azole  
488 compounds also have an effect on plants to a varying degree, where they generally cause  
489 growth inhibition, which may be due to interference with downstream BR biosynthesis  
490 (Scheinflug and Kuck, 1987; Vanden Bossche et al., 1987; Rozhon et al., 2013; Fabris et al.,  
491 2014). However, while nanomolar concentrations of azoles are usually sufficient to inhibit  
492 ergosterol biosynthesis in fungi, micromolar concentrations or higher are often needed to obtain  
493 a similar inhibitory effect on phytosterol biosynthesis in plants and diatoms (Vanden Bossche et  
494 al., 1987; Fabris et al., 2014). The cytochrome P450s are a superfamily of enzymes (Xu et al.,  
495 2015), that are often sensitive to imidazoles (Murray, 1999). Of note is that azoles can be found  
496 or even designed that display a certain degree of preference towards specific cytochrome P450  
497 enzymes. Well-known examples in plants are uniconazole as an inhibitor of CYP707As that are  
498 involved in abscisic acid catabolism (Saito *et al.*, 2006), and brassinazole as an inhibitor of  
499 CYP90B1 that is involved in brassinosteroid biosynthesis (Asami *et al.*, 2000). Importantly, both  
500 uniconazole and brassinazole can inhibit CYP90B1 activities, suggesting that one should be  
501 wary of off-target side effects when using these inhibitors, especially when using them at high  
502 concentrations. Recently, analysis of crystals of CYP90B1 in complex with uniconazole and  
503 brassinazole demonstrated important differences in binding conformation (Fujiyama *et al.*, 2019)  
504 which highlighted the importance of using crystal structures of plant CYPs to guide the design of  
505 new, more-specific inhibitors.



506 Besides the azoles, also pyrimidine-type fungicides, such as fenarimol **(20)**, nuarimol  
507 **(21)** and triarimol **(22)**, and pyridine-type fungicides are thought to affect the CYP51 ortholog  
508 and other cytochrome P450 enzymes, such as CYP710A1 in plants (Shive and Sisler, 1976;  
509 Schmitt and Benveniste, 1979; Buchenauer and Rohner, 1981; Burden et al., 1987; Scheinpflug  
510 and Kuck, 1987; Mercer et al., 1989; Leroux et al., 2008; Oh et al., 2015). Overall, these  
511 compounds all cause strong reductions in root- and shoot growth with varying potency, and are  
512 phytotoxic at high concentrations due to a severe reduction in phytosterols and an accumulation  
513 of 14 $\alpha$ -methylsterols (Burden et al., 1987; Lurssen, 1987).

514 CPI, C-14 sterol reductase and C-8,7 sterol isomerase are enzymes that catalyze similar  
515 reactions at different stages of the sterol biosynthesis pathway (Benveniste, 1986), making them  
516 shared targets for molecular inhibition. An important class of inhibitors that target these  
517 enzymes are the morpholine fungicides, such as fenpropimorph **(23)**, dodemorph **(24)**,  
518 aldimorph **(25)** and tridemorph **(26)** (Kerkenaar et al., 1981; Baloch et al., 1984; Baloch and  
519 Mercer, 1987; Mercer et al., 1989; Marcireau et al., 1990). These compounds exert their  
520 fungitoxicity by inhibiting C-8,7 sterol isomerase (nM concentrations) and/or C-14 sterol  
521 reductase ( $\mu$ M concentration) in fungi and yeast, with different morpholines having different  
522 specificities (Kerkenaar et al., 1981; Baloch et al., 1984; Baloch and Mercer, 1987; Kerkenaar,  
523 1987; Marcireau et al., 1990). For instance, while fenpropimorph can effectively inhibit both the  
524 C-8,7 sterol isomerase and C-14 sterol reductase in fungi, tridemorph primarily inhibits the C-8,7  
525 sterol isomerase (Baloch et al., 1984; Kerkenaar, 1987). However, morpholines also function in  
526 plants, albeit less potently and less specifically, where they have been shown to inhibit HYD1  
527 (the plant C-8,7 sterol isomerase) (Rahier et al., 1986; Taton et al., 1987), FK (the plant C-14  
528 sterol reductase) (Mercer et al., 1989; Taton et al., 1989; He et al., 2003) and CPI (Taton et al.,  
529 1987) to a varying degree. Similarly, fenpropimorph treatment caused alterations in the sterol  
530 content of the diatom *P. tricornutum* that could be explained by inhibition of multiple enzymes



531 involved in its sterol biosynthesis pathway (Fabris et al., 2014). While fenpropimorph is the most  
532 active and commonly used morpholine in plants, it requires relatively high concentrations to  
533 function (30 - 100  $\mu$ M), is unstable and relatively expensive. Plants treated with morpholines  
534 have a disturbed sterol profile and growth impairments, similar to mutants defective in the  
535 targeted enzymes (Bladocha and Benveniste, 1983; Burden et al., 1987; He et al., 2003).  
536 However, while the morpholine compounds disturb the normal sterol profile of plants, they are  
537 generally not phytotoxic (Bladocha and Benveniste, 1983; Taton et al., 1987, 1987).  
538 Interestingly, in plants, 8-azadecalins such as N-benzyl-8-aza-4 $\alpha$ ,10-dimethyl-trans-decal-3 $\beta$ -ol  
539 **(27)** and N-(1,5,9-trimethyldecyl)-4 $\alpha$ ,10-dimethyl-8-aza-trans-decal-3 $\beta$ -ol (TMDAD) **(28)** have  
540 been shown to be more potent inhibitors of HYD1 and CPI than the morpholines (Rahier et al.,  
541 1985; Taton et al., 1987). A strong, more specific inhibitor of C-14 sterol reductases is the  
542 antifungal agent 15-aza-24-methylene-D-homocholesta-8,14-dien-3 $\beta$ -ol (15-azasterol) **(29)**,  
543 which has been used to inhibit FK in several plant species, including Arabidopsis (Schrack et al.,  
544 2002) and bramble cells (Schmitt et al., 1980).

545 While most of the abovementioned sterol biosynthesis inhibitors have been used to  
546 inhibit plant growth and study plant and diatom sterol biosynthesis to some degree, it is clear  
547 that many of these compounds originate as antifungal compounds for which the effect in plants  
548 is often not completely understood. Indeed, much of the underlying mechanisms of these  
549 inhibitors in plants and diatoms are still not completely clear and are often presumed based on  
550 their function in fungi and/or animals. It should also be noted that only limited recent data is  
551 available for most of these inhibitors in plants, as evidenced by the relatively old sources  
552 referenced in the last paragraphs. This further supports the notion that the current knowledge  
553 and toolset of sterol biosynthesis inhibitors in plants is lacking. The identification of more active  
554 compounds that selectively target specific enzymes in the plant sterol biosynthesis pathway

555 through a systematic approach, informed by crystal structures, would therefore be highly  
556 welcomed to study sterol biosynthesis in the green lineage.

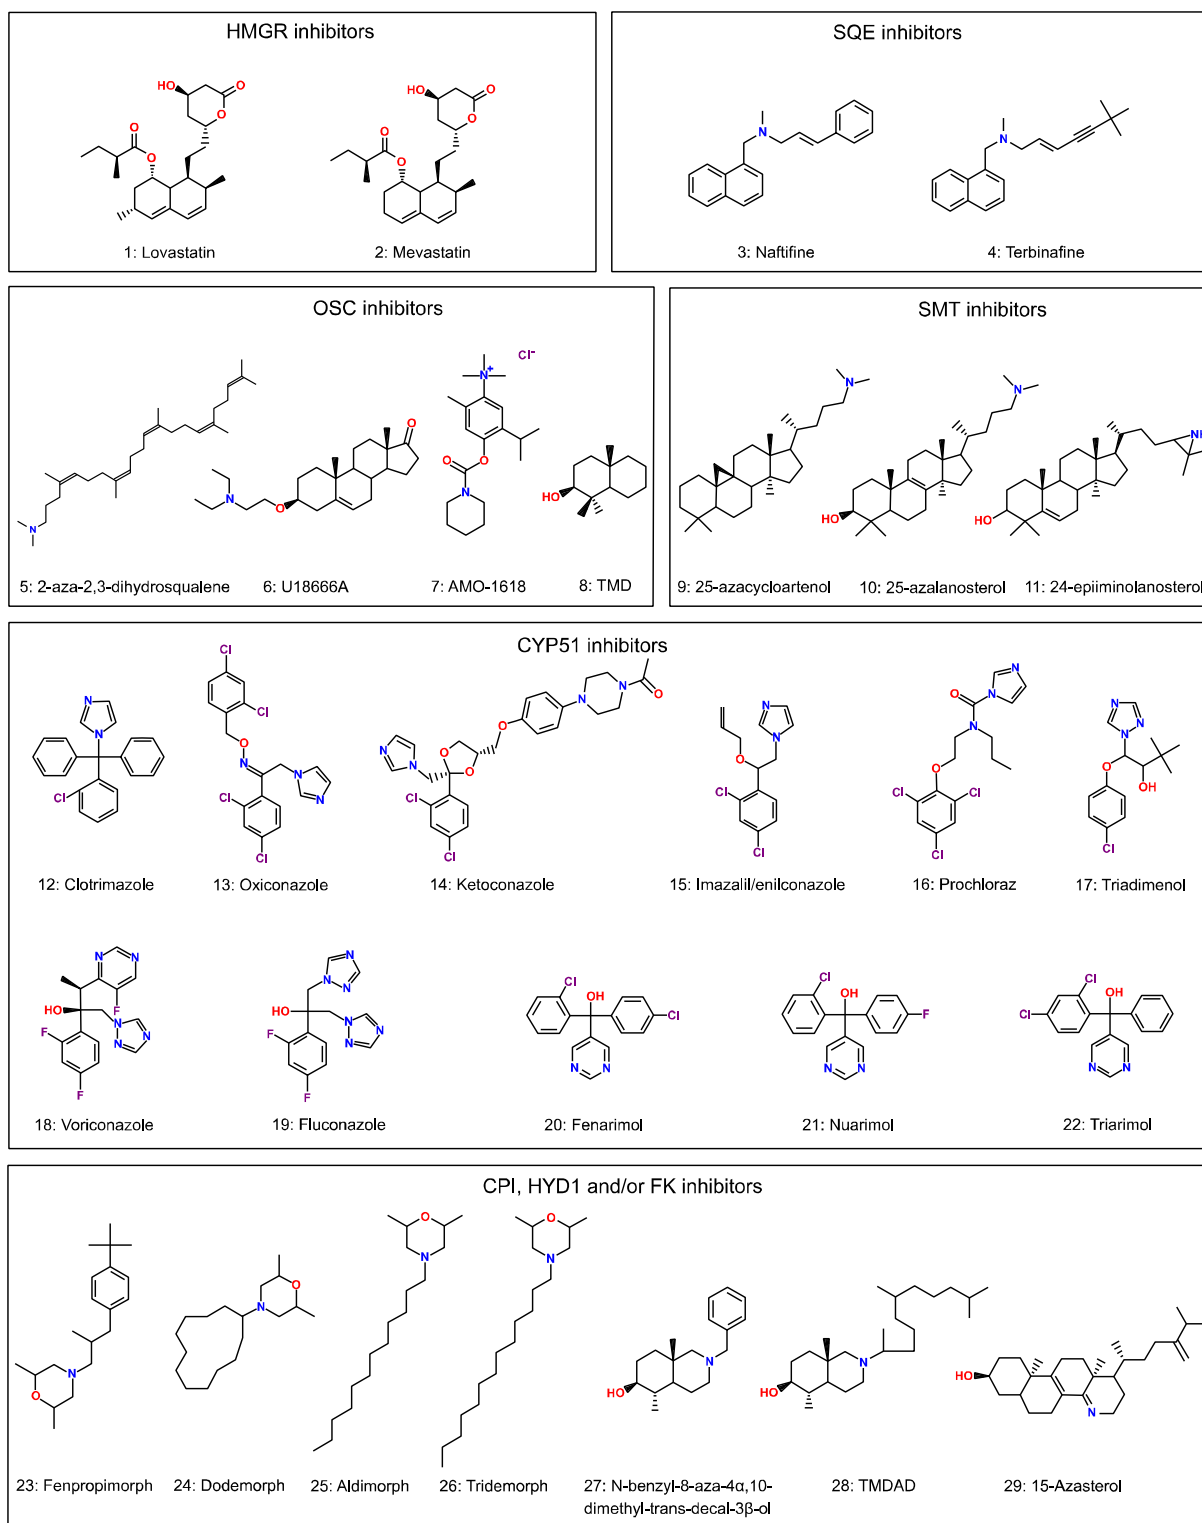

557

558 **Fig. 3. Structures of sterol biosynthesis inhibitors organized according to their putative targets.**

559 **Acknowledgments:** K.D.V. is funded by the Special Research Fund Ghent University.

560 **Author Contributions:** "Conceptualization, K.D.V and S.V..; All authors contributed to the writing and  
561 revision of the manuscript

562 **Conflicts of Interest:** The authors declare no conflict of interest

563

## 564 **References**

- 565 **Asami T, Min YK, Nagata N, Yamagishi K, Takatsuto S, Fujioka S, Murofushi N, Yamaguchi I, Yoshida S.** 2000.  
566 Characterization of brassinazole, a triazole-type brassinosteroid biosynthesis inhibitor. *Plant Physiol* **123**, 93-100.
- 567 **Ator MA, Schmidt SJ, Adams JL, Dolle RE, Kruse LI, Frey CL, Barone JM.** 1992. Synthesis, specificity, and  
568 antifungal activity of inhibitors of the *Candida albicans* delta 24-sterol methyltransferase. *Journal of medicinal*  
569 *chemistry* **35**, 100-106.
- 570 **Azpiroz R, Wu Y, LoCascio JC, Feldmann KA.** 1998. An *Arabidopsis* brassinosteroid-dependent mutant is blocked  
571 in cell elongation. *The Plant cell* **10**, 219-230.
- 572 **Babiychuk E, Bouvier-Nave P, Compagnon V, Suzuki M, Muranaka T, Van Montagu M, Kushnir S, Schaller H.**  
573 2008. Allelic mutant series reveal distinct functions for *Arabidopsis* cycloartenol synthase 1 in cell viability and plastid  
574 biogenesis. *Proceedings of the National Academy of Sciences of the United States of America* **105**, 3163-3168.
- 575 **Bach TJ, Lichtenthaler HK.** 1982. Mevinolin: a highly specific inhibitor of microsomal 3-hydroxy-3-methylglutaryl-  
576 coenzyme A reductase of radish plants. *Zeitschrift fur Naturforschung. Section C, Biosciences* **37**, 46-50.
- 577 **Bach TJ, Lichtenthaler HK.** 1987. *Plant-Growth Regulation by Mevinolin and Other Sterol Biosynthesis Inhibitors.*  
578 *Acs Symposium Series* **325**, 109-139.
- 579 **Baloch RI, Mercer EI.** 1987. Inhibition of Sterol Delta-8-]Delta-7-Isomerase and Delta-14-Reductase by  
580 Fenpropimorph, Tridemorph and Fenpropidin in Cell-Free Enzyme-Systems from *Saccharomyces-Cerevisiae*.  
581 *Phytochemistry* **26**, 663-668.
- 582 **Baloch RI, Mercer EI, Wiggins TE, Baldwin BC.** 1984. Inhibition of Ergosterol Biosynthesis in *Saccharomyces-*  
583 *Cerevisiae* and *Ustilago-Maydis* by Tridemorph, Fenpropimorph and Fenpropidin. *Phytochemistry* **23**, 2219-2226.
- 584 **Banerjee A, Sharkey TD.** 2014. Methylerythritol 4-phosphate (MEP) pathway metabolic regulation. *Natural product*  
585 *reports* **31**, 1043-1055.
- 586 **Baxter A, Fitzgerald BJ, Hutson JL, McCarthy AD, Motteram JM, Ross BC, Sapra M, Snowden MA, Watson**  
587 **NS, Williams RJ, et al.** 1992. Squalostatin 1, a potent inhibitor of squalene synthase, which lowers serum cholesterol  
588 in vivo. *The Journal of biological chemistry* **267**, 11705-11708.
- 589 **Becher R, Wirsal SG.** 2012. Fungal cytochrome P450 sterol 14alpha-demethylase (CYP51) and azole resistance in  
590 plant and human pathogens. *Applied microbiology and biotechnology* **95**, 825-840.
- 591 **Behrman EJ, Gopalan V.** 2005. Cholesterol and plants. *Journal of Chemical Education* **82**, 1791-1793.
- 592 **Benveniste P.** 1986. Sterol Biosynthesis. *Annual Review of Plant Physiology and Plant Molecular Biology* **37**, 275-  
593 308.
- 594 **Benveniste P.** 2002. Sterol metabolism. *The arabidopsis book* **1**, e0004.
- 595 **Benveniste P.** 2004. Biosynthesis and accumulation of sterols. *Annual review of plant biology* **55**, 429-457.
- 596 **Bergstrom JD, Kurtz MM, Rew DJ, Amend AM, Karkas JD, Bostedor RG, Bansal VS, Dufresne C,**  
597 **VanMiddlesworth FL, Hensens OD, et al.** 1993. Zaragozic acids: a family of fungal metabolites that are picomolar  
598 competitive inhibitors of squalene synthase. *Proceedings of the National Academy of Sciences of the United States of*  
599 *America* **90**, 80-84.
- 600 **Berry AM, Harriott OT, Moreau RA, Osman SF, Benson DR, Jones AD.** 1993. Hopanoid lipids compose the  
601 *Frankia vesicle* envelope, presumptive barrier of oxygen diffusion to nitrogenase. *Proc Natl Acad Sci U S A* **90**, 6091-  
602 6094.
- 603 **Birnbaum JE.** 1990. Pharmacology of the allylamines. *Journal of the American Academy of Dermatology* **23**, 782-  
604 785.

- 605 **Bladocha M, Benveniste P.** 1983. Manipulation by tridemorph, a systemic fungicide, of the sterol composition of  
606 maize leaves and roots. *Plant physiology* **71**, 756-762.
- 607 **Bode HB, Zeggel B, Silakowski B, Wenzel SC, Reichenbach H, Muller R.** 2003. Steroid biosynthesis in  
608 prokaryotes: identification of myxobacterial steroids and cloning of the first bacterial 2,3(S)-oxidosqualene cyclase  
609 from the myxobacterium *Stigmatella aurantiaca*. *Mol Microbiol* **47**, 471-481.
- 610 **Boucher Y, Kamekura M, Doolittle WF.** 2004. Origins and evolution of isoprenoid lipid biosynthesis in archaea. *Mol*  
611 *Microbiol* **52**, 515-527.
- 612 **Bouvier-Nave P, Husselstein T, Benveniste P.** 1998. Two families of sterol methyltransferases are involved in the  
613 first and the second methylation steps of plant sterol biosynthesis. *European journal of biochemistry* **256**, 88-96.
- 614 **Bouvier-Nave P, Husselstein T, Desprez T, Benveniste P.** 1997. Identification of cDNAs encoding sterol methyl-  
615 transferases involved in the second methylation step of plant sterol biosynthesis. *European journal of biochemistry*  
616 **246**, 518-529.
- 617 **Buchenauer H, Rohner E.** 1981. Effect of Triadimefon and Triadimenol on Growth of Various Plant-Species as Well  
618 as on Gibberellin Content and Sterol-Metabolism in Shoots of Barley Seedlings. *Pesticide Biochemistry and*  
619 *Physiology* **15**, 58-70.
- 620 **Buhaescu I, Izzedine H.** 2007. Mevalonate pathway: a review of clinical and therapeutical implications. *Clinical*  
621 *biochemistry* **40**, 575-584.
- 622 **Burden RS, Clark T, Holloway PJ.** 1987. Effects of Sterol Biosynthesis-Inhibiting Fungicides and Plant-Growth  
623 Regulators on the Sterol Composition of Barley Plants. *Pesticide Biochemistry and Physiology* **27**, 289-300.
- 624 **Busquets A, Keim V, Closa M, del Arco A, Boronat A, Arro M, Ferrer A.** 2008. *Arabidopsis thaliana* contains a  
625 single gene encoding squalene synthase. *Plant molecular biology* **67**, 25-36.
- 626 **Cacas JL, Furt F, Le Guedard M, Schmitter JM, Bure C, Gerbeau-Pissot P, Moreau P, Bessoule JJ, Simon-**  
627 **Plas F, Mongrand S.** 2012. Lipids of plant membrane rafts. *Progress in lipid research* **51**, 272-299.
- 628 **Cardenas PD, Sonawane PD, Heinig U, Bocobza SE, Burdman S, Aharoni A.** 2015. The bitter side of the  
629 nightshades: Genomics drives discovery in Solanaceae steroidal alkaloid metabolism. *Phytochemistry* **113**, 24-32.
- 630 **Carland F, Fujioka S, Nelson T.** 2010. The sterol methyltransferases SMT1, SMT2, and SMT3 influence  
631 *Arabidopsis* development through nonbrassinosteroid products. *Plant physiology* **153**, 741-756.
- 632 **Carland FM, Fujioka S, Takatsuto S, Yoshida S, Nelson T.** 2002. The identification of CVP1 reveals a role for  
633 sterols in vascular patterning. *The Plant cell* **14**, 2045-2058.
- 634 **Cattel L, Ceruti M, Viola F, Delprino L, Balliano G, Duriatti A, Bouvier-Nave P.** 1986. The squalene-2,3-epoxide  
635 cyclase as a model for the development of new drugs. *Lipids* **21**, 31-38.
- 636 **Catterou M, Dubois F, Schaller H, Aubanelle L, Vilcot B, Sangwan-Norreel BS, Sangwan RS.** 2001.  
637 Brassinosteroids, microtubules and cell elongation in *Arabidopsis thaliana*. I. Molecular, cellular and physiological  
638 characterization of the *Arabidopsis* bull mutant, defective in the delta 7-sterol-C5-desaturation step leading to  
639 brassinosteroid biosynthesis. *Planta* **212**, 659-672.
- 640 **Chappell J.** 2002. The genetics and molecular genetics of terpene and sterol origami. *Current opinion in plant*  
641 *biology* **5**, 151-157.
- 642 **Choe S, Dilkes BP, Gregory BD, Ross AS, Yuan H, Noguchi T, Fujioka S, Takatsuto S, Tanaka A, Yoshida S,**  
643 **Tax FE, Feldmann KA.** 1999. The *Arabidopsis* dwarf1 mutant is defective in the conversion of 24-  
644 methylenecholesterol to campesterol in brassinosteroid biosynthesis. *Plant physiology* **119**, 897-907.

- 645 **Choe S, Noguchi T, Fujioka S, Takatsuto S, Tissier CP, Gregory BD, Ross AS, Tanaka A, Yoshida S, Tax FE,**  
646 **Feldmann KA.** 1999. The Arabidopsis dwf7/ste1 mutant is defective in the delta7 sterol C-5 desaturation step leading  
647 to brassinosteroid biosynthesis. *The Plant cell* **11**, 207-221.
- 648 **Choe S, Tanaka A, Noguchi T, Fujioka S, Takatsuto S, Ross AS, Tax FE, Yoshida S, Feldmann KA.** 2000.  
649 Lesions in the sterol delta reductase gene of Arabidopsis cause dwarfism due to a block in brassinosteroid  
650 biosynthesis. *The Plant journal : for cell and molecular biology* **21**, 431-443.
- 651 **Clouse SD.** 2000. Plant development: A role for sterols in embryogenesis. *Current biology : CB* **10**, R601-604.
- 652 **Clouse SD.** 2002. Arabidopsis mutants reveal multiple roles for sterols in plant development. *The Plant cell* **14**, 1995-  
653 2000.
- 654 **Clouse SD.** 2011. Brassinosteroids. *The arabidopsis book* **9**, e0151.
- 655 **Darnet S, Rahier A.** 2004. Plant sterol biosynthesis: identification of two distinct families of sterol 4alpha-methyl  
656 oxidases. *The Biochemical journal* **378**, 889-898.
- 657 **Davies JT, Delfino SF, Feinberg CE, Johnson MF, Nappi VL, Olinger JT, Schwab AP, Swanson HI.** 2016.  
658 Current and Emerging Uses of Statins in Clinical Therapeutics: A Review. *Lipid insights* **9**, 13-29.
- 659 **Dellas N, Noel JP.** 2010. Mutation of archaeal isopentenyl phosphate kinase highlights mechanism and guides  
660 phosphorylation of additional isoprenoid monophosphates. *ACS chemical biology* **5**, 589-601.
- 661 **Diener AC, Li H, Zhou W, Whoriskey WJ, Nes WD, Fink GR.** 2000. Sterol methyltransferase 1 controls the level of  
662 cholesterol in plants. *The Plant cell* **12**, 853-870.
- 663 **Dinan L.** 2001. Phytoecdysteroids: biological aspects. *Phytochemistry* **57**, 325-339.
- 664 **Doblas VG, Amorim-Silva V, Pose D, Rosado A, Esteban A, Arro M, Azevedo H, Bombarely A, Borsani O,**  
665 **Valpuesta V, Ferrer A, Tavares RM, Botella MA.** 2013. The SUD1 gene encodes a putative E3 ubiquitin ligase and  
666 is a positive regulator of 3-hydroxy-3-methylglutaryl coenzyme a reductase activity in Arabidopsis. *The Plant cell* **25**,  
667 728-743.
- 668 **Douglas TJ, Paleg LG.** 1978. Amo 1618 and Sterol Biosynthesis in Tissues and Subcellular-Fractions of Tobacco  
669 Seedlings. *Phytochemistry* **17**, 705-712.
- 670 **Douglas TJ, Paleg LG.** 1978. Amo 1618 Effects on Incorporation of Mva-C-14 and Acetate-C-14 into Sterols in  
671 Nicotiana and Digitalis Seedlings and Cell-Free Preparations from Nicotiana. *Phytochemistry* **17**, 713-718.
- 672 **Douglas TJ, Paleg LG.** 1981. Inhibition of Sterol Biosynthesis and Stem Elongation of Tobacco Seedlings Induced  
673 by Some Hypocholesterolemic Agents. *Journal of Experimental Botany* **32**, 59-68.
- 674 **Duriatti A, Bouvier-Nave P, Benveniste P, Schuber F, Delprino L, Balliano G, Cattell L.** 1985. In vitro inhibition of  
675 animal and higher plants 2,3-oxidosqualene-sterol cyclases by 2-aza-2,3-dihydrosqualene and derivatives, and by  
676 other ammonium-containing molecules. *Biochemical pharmacology* **34**, 2765-2777.
- 677 **Edwards PA, Ericsson J.** 1999. Sterols and isoprenoids: signaling molecules derived from the cholesterol  
678 biosynthetic pathway. *Annual review of biochemistry* **68**, 157-185.
- 679 **Enjuto M, Balcells L, Campos N, Caelles C, Arro M, Boronat A.** 1994. Arabidopsis thaliana contains two  
680 differentially expressed 3-hydroxy-3-methylglutaryl-CoA reductase genes, which encode microsomal forms of the  
681 enzyme. *Proc Natl Acad Sci U S A* **91**, 927-931.
- 682 **Enjuto M, Lumbreras V, Marin C, Boronat A.** 1995. Expression of the Arabidopsis HMG2 gene, encoding 3-  
683 hydroxy-3-methylglutaryl coenzyme A reductase, is restricted to meristematic and floral tissues. *Plant Cell* **7**, 517-  
684 527.

- 685 **Fabris M, Matthijs M, Carbonelle S, Moses T, Pollier J, Dasseville R, Baart GJ, Vyverman W, Goossens A.**  
686 2014. Tracking the sterol biosynthesis pathway of the diatom *Phaeodactylum tricornutum*. *The New phytologist* **204**,  
687 521-535.
- 688 **Farese RV, Jr., Herz J.** 1998. Cholesterol metabolism and embryogenesis. *Trends in genetics : TIG* **14**, 115-120.
- 689 **Fujioka S, Sakurai A.** 1997. Brassinosteroids. *Natural product reports* **14**, 1-10.
- 690 **Fujiyama K, Hino T, Kanadani M, Watanabe B, Jae Lee H, Mizutani M, Nagano S.** 2019. Structural insights into a  
691 key step of brassinosteroid biosynthesis and its inhibition. *Nat Plants* **5**, 589-594.
- 692 **Gachotte D, Husselstein T, Bard M, Lacroute F, Benveniste P.** 1996. Isolation and characterization of an  
693 *Arabidopsis thaliana* cDNA encoding a delta 7-sterol-C-5-desaturase by functional complementation of a defective  
694 yeast mutant. *The Plant journal : for cell and molecular biology* **9**, 391-398.
- 695 **Galea AM, Brown AJ.** 2009. Special relationship between sterols and oxygen: were sterols an adaptation to aerobic  
696 life? *Free Radic Biol Med* **47**, 880-889.
- 697 **Gas-Pascual E, Berna A, Bach TJ, Schaller H.** 2014. Plant oxidosqualene metabolism: cycloartenol synthase-  
698 dependent sterol biosynthesis in *Nicotiana benthamiana*. *PloS one* **9**, e109156.
- 699 **Goldstein JL, Brown MS.** 1990. Regulation of the mevalonate pathway. *Nature* **343**, 425-430.
- 700 **Grandmougin-Ferjani A, Schuler-Muller I, Hartmann MA.** 1997. Sterol Modulation of the Plasma Membrane H<sup>+</sup>-  
701 ATPase Activity from Corn Roots Reconstituted into Soybean Lipids. *Plant physiology* **113**, 163-174.
- 702 **Grunwald C.** 1971. Effects of free sterols, steryl ester, and steryl glycoside on membrane permeability. *Plant*  
703 *physiology* **48**, 653-655.
- 704 **Guo DA, Venkatramesh M, Nes WD.** 1995. Developmental regulation of sterol biosynthesis in *Zea mays*. *Lipids* **30**,  
705 203-219.
- 706 **Hartmann MA.** 1998. Plant sterols and the membrane environment. *Trends in Plant Science* **3**, 170-175.
- 707 **Hartmann MA, Benveniste P.** 1987. Plant Membrane Sterols - Isolation, Identification, and Biosynthesis. *Methods in*  
708 *Enzymology* **148**: 632-650.
- 709 **Hartmann MA, Wentzinger L, Hemmerlin A, Bach TJ.** 2000. Metabolism of farnesyl diphosphate in tobacco BY-2  
710 cells treated with squalestatin. *Biochemical Society transactions* **28**, 794-796.
- 711 **He JX, Fujioka S, Li TC, Kang SG, Seto H, Takatsuto S, Yoshida S, Jang JC.** 2003. Sterols regulate development  
712 and gene expression in *Arabidopsis*. *Plant physiology* **131**, 1258-1269.
- 713 **He Z, Wang ZY, Li J, Zhu Q, Lamb C, Ronald P, Chory J.** 2000. Perception of brassinosteroids by the extracellular  
714 domain of the receptor kinase BRI1. *Science (New York, N.Y.)* **288**, 2360-2363.
- 715 **Henry LK, Gutensohn M, Thomas ST, Noel JP, Dudareva N.** 2015. Orthologs of the archaeal isopentenyl  
716 phosphate kinase regulate terpenoid production in plants. *Proceedings of the National Academy of Sciences of the*  
717 *United States of America* **112**, 10050-10055.
- 718 **Henry LK, Thomas ST, Widhalm JR, Lynch JH, Davis TC, Kessler SA, Bohlmann J, Noel JP, Dudareva N.**  
719 2018. Contribution of isopentenyl phosphate to plant terpenoid metabolism. *Nature plants* **4**, 721-729.
- 720 **Hodzic A, Rappolt M, Amenitsch H, Laggner P, Pabst G.** 2008. Differential modulation of membrane structure and  
721 fluctuations by plant sterols and cholesterol. *Biophysical journal* **94**, 3935-3944.
- 722 **Hoshino T, Kobayashi N, Ishibashi E, Hashimoto S.** 1995. Inhibitory activity of 8-azadecalin derivatives towards  
723 2,3-oxidosqualene:lanosterol cyclases from baker's yeast and pig's liver. *Bioscience, biotechnology, and biochemistry*  
724 **59**, 602-609.
- 725 **Istvan ES, Deisenhofer J.** 2001. Structural mechanism for statin inhibition of HMG-CoA reductase. *Science (New*  
726 *York, N.Y.)* **292**, 1160-1164.



- 727 **Japelt RB, Jakobsen J.** 2013. Vitamin D in plants: a review of occurrence, analysis, and biosynthesis. *Frontiers in*  
728 *plant science* **4**, 136.
- 729 **Kerkenaar A.** 1987. Mechanism of action of morpholine fungicides. *Modern Selective Fungicides - Properties,*  
730 *Applications, Mechanisms of Action.*
- 731 **Kerkenaar A, Uchiyama M, Versluis GG.** 1981. Specific Effects of Tridemorph on Sterol Biosynthesis in *Ustilago*-  
732 *Maydis.* *Pesticide Biochemistry and Physiology* **16**, 97-104.
- 733 **Kim YJ, Lee OR, Oh JY, Jang MG, Yang DC.** 2014. Functional analysis of 3-hydroxy-3-methylglutaryl coenzyme a  
734 reductase encoding genes in triterpene saponin-producing ginseng. *Plant physiology* **165**, 373-387.
- 735 **Klahre U, Noguchi T, Fujioka S, Takatsuto S, Yokota T, Nomura T, Yoshida S, Chua NH.** 1998. The Arabidopsis  
736 DIMINUTO/DWARF1 gene encodes a protein involved in steroid synthesis. *The Plant cell* **10**, 1677-1690.
- 737 **Kolesnikova MD, Xiong Q, Lodeiro S, Hua L, Matsuda SP.** 2006. Lanosterol biosynthesis in plants. *Archives of*  
738 *biochemistry and biophysics* **447**, 87-95.
- 739 **Kulkarni R, Pandit S, Chidley H, Nagel R, Schmidt A, Gershenzon J, Pujari K, Giri A, Gupta V.** 2013.  
740 Characterization of three novel isoprenyl diphosphate synthases from the terpenoid rich mango fruit. *Plant physiology*  
741 *and biochemistry : PPB* **71**, 121-131.
- 742 **Laloi M, Perret AM, Chatre L, Melser S, Cantrel C, Vaultier MN, Zachowski A, Bathany K, Schmitter JM, Vallet**  
743 **M, Lessire R, Hartmann MA, Moreau P.** 2007. Insights into the role of specific lipids in the formation and delivery of  
744 lipid microdomains to the plasma membrane of plant cells. *Plant physiology* **143**, 461-472.
- 745 **Laranjeira S, Amorim-Silva V, Esteban A, Arro M, Ferrer A, Tavares RM, Botella MA, Rosado A, Azevedo H.**  
746 2015. Arabidopsis Squalene Epoxidase 3 (SQE3) Complements SQE1 and Is Important for Embryo Development  
747 and Bulk Squalene Epoxidase Activity. *Molecular plant* **8**, 1090-1102.
- 748 **Laule O, Furholz A, Chang HS, Zhu T, Wang X, Heifetz PB, Gruissem W, Lange M.** 2003. Crosstalk between  
749 cytosolic and plastidial pathways of isoprenoid biosynthesis in Arabidopsis thaliana. *Proceedings of the National*  
750 *Academy of Sciences of the United States of America* **100**, 6866-6871.
- 751 **Leber R, Fuchsbichler S, Klobucnikova V, Schweighofer N, Pitters E, Wohlfarter K, Lederer M, Landl K,**  
752 **Ruckenstuhl C, Hapala I, Turnowsky F.** 2003. Molecular mechanism of terbinafine resistance in *Saccharomyces*  
753 *cerevisiae.* *Antimicrob Agents Chemother* **47**, 3890-3900.
- 754 **Lenton JR.** 1987. Mode of action of triazole growth retardants and fungicides—a progress report. *New Bull Brit Plant*  
755 *Growth Reg Group* **9**, 1-12.
- 756 **Lepesheva GI, Waterman MR.** 2007. Sterol 14alpha-demethylase cytochrome P450 (CYP51), a P450 in all  
757 biological kingdoms. *Biochimica et biophysica acta* **1770**, 467-477.
- 758 **Leroux P, Bach J, Debieu D, Fillinger S, Fritz R, Walker AS.** 2008. Mode of action of sterol biosynthesis inhibitors  
759 and resistance phenomena in fungi. *Modern Fungicides and Antifungal Compounds V.*
- 760 **Lindsey K, Pullen ML, Topping JF.** 2003. Importance of plant sterols in pattern formation and hormone signalling.  
761 *Trends in plant science* **8**, 521-525.
- 762 **Lohr M, Schwender J, Polle JE.** 2012. Isoprenoid biosynthesis in eukaryotic phototrophs: a spotlight on algae. *Plant*  
763 *Sci* **185-186**, 9-22.
- 764 **Lombard J, Moreira D.** 2011. Origins and early evolution of the mevalonate pathway of isoprenoid biosynthesis in  
765 the three domains of life. *Mol Biol Evol* **28**, 87-99.
- 766 **Lurssen K.** 1987. Physiological-Effects of Triazole Pgr in Relation to Their Biochemical-Mode of Action. *Pesticide*  
767 *Science* **21**, 310-311.

- 768 **Malinsky J, Opekarova M, Grossmann G, Tanner W.** 2013. Membrane microdomains, rafts, and detergent-  
769 resistant membranes in plants and fungi. *Annual review of plant biology* **64**, 501-529.
- 770 **Mangiarotti A, Genovese DM, Naumann CA, Monti MR, Wilke N.** 2019. Hopanoids, like sterols, modulate  
771 dynamics, compaction, phase segregation and permeability of membranes. *Biochim Biophys Acta Biomembr* **1861**,  
772 183060.
- 773 **Mangla AT, Nes WD.** 2000. Sterol C-methyl transferase from *Prototheca wickerhamii* mechanism, sterol specificity  
774 and inhibition. *Bioorganic & medicinal chemistry* **8**, 925-936.
- 775 **Manzano D, Andrade P, Caudepon D, Altabella T, Arro M, Ferrer A.** 2016. Suppressing Farnesyl Diphosphate  
776 Synthase Alters Chloroplast Development and Triggers Sterol-Dependent Induction of Jasmonate- and Fe-Related  
777 Responses. *Plant Physiol* **172**, 93-117.
- 778 **Marcireau C, Guilloton M, Karst F.** 1990. In vivo Effects of Fenpropimorph on the Yeast *Saccharomyces-Cerevisiae*  
779 and Determination of the Molecular-Basis of the Antifungal Property. *Antimicrobial Agents and Chemotherapy* **34**,  
780 989-993.
- 781 **Meance J, Duperon P, Duperon R.** 1976. Localization of Sterol Compounds inside Mitochondria from Cauliflower  
782 Buds. *Physiologie Vegetale* **14**, 745-756.
- 783 **Men S, Boutte Y, Ikeda Y, Li X, Palme K, Stierhof YD, Hartmann MA, Moritz T, Grebe M.** 2008. Sterol-dependent  
784 endocytosis mediates post-cytokinetic acquisition of PIN2 auxin efflux carrier polarity. *Nature cell biology* **10**, 237-  
785 244.
- 786 **Mendoza-Poudereux I, Kutzner E, Huber C, Segura J, Eisenreich W, Arrillaga I.** 2015. Metabolic cross-talk  
787 between pathways of terpenoid backbone biosynthesis in spike lavender. *Plant Physiol Biochem* **95**, 113-120.
- 788 **Mercer EI, Khalil IA, Wang ZX.** 1989. Effect of some sterol-biosynthesis-inhibiting fungicides on the biosynthesis of  
789 polyisoprenoid compounds in barley seedlings. *Steroids* **53**, 393-412.
- 790 **Milner SE, Brunton NP, Jones PW, O'Brien NM, Collins SG, Maguire AR.** 2011. Bioactivities of glycoalkaloids and  
791 their aglycones from *Solanum* species. *Journal of agricultural and food chemistry* **59**, 3454-3484.
- 792 **Mongrand S, Morel J, Laroche J, Claverol S, Carde JP, Hartmann MA, Bonneau M, Simon-Plas F, Lessire R,  
793 Bessoule JJ.** 2004. Lipid rafts in higher plant cells: purification and characterization of Triton X-100-insoluble  
794 microdomains from tobacco plasma membrane. *The Journal of biological chemistry* **279**, 36277-36286.
- 795 **Morikawa T, Mizutani M, Aoki N, Watanabe B, Saga H, Saito S, Oikawa A, Suzuki H, Sakurai N, Shibata D,  
796 Wadano A, Sakata K, Ohta D.** 2006. Cytochrome P450 CYP710A encodes the sterol C-22 desaturase in  
797 *Arabidopsis* and tomato. *The Plant cell* **18**, 1008-1022.
- 798 **Mouritsen OG.** 2005. Cholesterol on the scene. Life—as a matter of fat: the emerging science of lipidomics, 149–157
- 799 **Murray M.** 1999. Mechanisms and significance of inhibitory drug interactions involving cytochrome P450 enzymes  
800 (review). *Int J Mol Med* **3**, 227-238.
- 801 **Neelakandan AK, Song Z, Wang J, Richards MH, Wu X, Valliyodan B, Nguyen HT, Nes WD.** 2009. Cloning,  
802 functional expression and phylogenetic analysis of plant sterol 24C-methyltransferases involved in sitosterol  
803 biosynthesis. *Phytochemistry* **70**, 1982-1998.
- 804 **Nes WD.** 2000. Sterol methyl transferase: enzymology and inhibition. *Biochimica et biophysica acta* **1529**, 63-88
- 805 **Nes WD.** 2011. Biosynthesis of cholesterol and other sterols. *Chemical reviews* **111**, 6423-6451.
- 806 **Nowosielski M, Hoffmann M, Wyrwicz LS, Stepniak P, Plewczynski DM, Lazniewski M, Ginalski K, Rychlewski  
807 L.** 2011. Detailed mechanism of squalene epoxidase inhibition by terbinafine. *J Chem Inf Model* **51**, 455-462.
- 808 **Oh K, Matsumoto T, Yamagami A, Hoshi T, Nakano T, Yoshizawa Y.** 2015. Fenarimol, a Pyrimidine-Type  
809 Fungicide, Inhibits Brassinosteroid Biosynthesis. *International journal of molecular sciences* **16**, 17273-17288.

- 810 **Ohyama K, Suzuki M, Kikuchi J, Saito K, Muranaka T.** 2009. Dual biosynthetic pathways to phytosterol via  
811 cycloartenol and lanosterol in Arabidopsis. *Proceedings of the National Academy of Sciences of the United States of*  
812 *America* **106**, 725-730.
- 813 **Pan J, Fujioka S, Peng J, Chen J, Li G, Chen R.** 2009. The E3 ubiquitin ligase SCFTIR1/AFB and membrane  
814 sterols play key roles in auxin regulation of endocytosis, recycling, and plasma membrane accumulation of the auxin  
815 efflux transporter PIN2 in Arabidopsis thaliana. *The Plant cell* **21**, 568-580.
- 816 **Piironen V, Lindsay DG, Miettinen TA, Toivo J, Lampi AM.** 2000. Plant sterols: biosynthesis, biological function  
817 and their importance to human nutrition. *Journal of the Science of Food and Agriculture* **80**, 939-966.
- 818 **Pollier J, Vancaester E, Kuzhiumparambil U, Vickers CE, Vandepoele K, Goossens A, Fabris M.** 2019. A  
819 widespread alternative squalene epoxidase participates in eukaryote steroid biosynthesis. *Nature microbiology* **4**:  
820 226-233.
- 821 **Pose D, Castanedo I, Borsani O, Nieto B, Rosado A, Taconnat L, Ferrer A, Dolan L, Valpuesta V, Botella MA.**  
822 2009. Identification of the Arabidopsis dry2/sqe1-5 mutant reveals a central role for sterols in drought tolerance and  
823 regulation of reactive oxygen species. *The Plant journal : for cell and molecular biology* **59**, 63-76.
- 824 **Rahier A, Genot JC, Schuber F, Benveniste P, Narula AS.** 1984. Inhibition of S-adenosyl-L-methionine sterol-C-  
825 24-methyltransferase by analogues of a carbocationic ion high-energy intermediate. Structure activity relationships for  
826 C-25 heteroatoms (N, As, S) substituted triterpenoid derivatives. *The Journal of biological chemistry* **259**, 15215-  
827 15223.
- 828 **Rahier A, Narula AS, Benveniste P, Schmitt P.** 1980. 25-Azacycloartanol, a potent inhibitor of S-adenosyl-L-  
829 methionine-sterol-C-24 and C-28 methyltransferases in higher plant cells. *Biochemical and biophysical research*  
830 *communications* **92**, 20-25.
- 831 **Rahier A, Schmitt P, Huss B, Benveniste P, Pommer EH.** 1986. Chemical-Structure Activity Relationships of the  
832 Inhibition of Sterol Biosynthesis by N-Substituted Morpholines in Higher-Plants. *Pesticide Biochemistry and*  
833 *Physiology* **25**, 112-124.
- 834 **Rahier A, Taton M.** 1986. The 14 alpha-demethylation of obtusifoliol by a cytochrome P-450 monooxygenase from  
835 higher plants' microsomes. *Biochemical and biophysical research communications* **140**, 1064-1072.
- 836 **Rahier A, Taton M, Bouviernave P, Schmitt P, Benveniste P, Schuber F, Narula AS, Cattel L, Anding C, Place**  
837 **P.** 1986. Design of High-Energy Intermediate Analogs to Study Sterol Biosynthesis in Higher-Plants. *Lipids* **21**, 52-62.
- 838 **Rahier A, Taton M, Schmitt P, Benveniste P, Place P, Anding C.** 1985. Inhibition of Delta-8-]Delta-7-Sterol  
839 Isomerase and of Cycloeucalenol Obtusifoliol Isomerase by N-Benzyl-8-Aza-4-Alpha,10-Dimethyl-Trans-Decal-3-  
840 Beta-Ol, an Analog of a Carbocationic High-Energy Intermediate. *Phytochemistry* **24**, 1223-1232.
- 841 **Rasbery JM, Shan H, LeClair RJ, Norman M, Matsuda SP, Bartel B.** 2007. Arabidopsis thaliana squalene  
842 epoxidase 1 is essential for root and seed development. *The Journal of biological chemistry* **282**, 17002-17013.
- 843 **Raveendranath PC, Newcomb LF, Ray NC, Clark DS, Spencer TA.** 1990. 7,7-Disubstituted Derivatives of 4,4-10-  
844 Beta-Trimethyl-Trans-Decal-3-Beta-Ol(Tmd). *Synthetic Communications* **20**, 2723-2731.
- 845 **Rees HH, Goad LJ, Goodwin TW.** 1969. 2,3-oxidosqualene cycloartenol cyclase from Ochromonas malhamensis.  
846 *Biochimica et biophysica acta* **176**, 892-894.
- 847 **Rivas-Marin E, Stettner S, Gottshall EY, Santana-Molina C, Helling M, Basile F, Ward NL, Devos DP.** 2019.  
848 Essentiality of sterol synthesis genes in the planctomycete bacterium Gemmata obscuriglobus. *Nat Commun* **10**,  
849 2916.
- 850 **Rogerson TD, Wilkinson CF, Hetarski K.** 1977. Steric factors in the inhibitory interaction of imidazoles with  
851 microsomal enzymes. *Biochemical pharmacology* **26**, 1039-1042.

- 852 **Rozhon W, Husar S, Kalaivanan F, Khan M, Idlhammer M, Shumilina D, Lange T, Hoffmann T, Schwab W,**  
853 **Fujioka S, Poppenberger B.** 2013. Genetic variation in plant CYP51s confers resistance against voriconazole, a  
854 novel inhibitor of brassinosteroid-dependent sterol biosynthesis. *PLoS one* **8**, e53650.
- 855 **Ruhl KK, Anzalone L, Arguropoulos ED, Gayen AK, Spencer TA.** 1989. Azadecalin Analogs of 4,4,10beta-  
856 Trimethyl-Trans-Decal-3beta-Ol - Synthesis and Assay as Inhibitors of Oxidosqualene Cyclase. *Bioorganic Chemistry*  
857 **17**, 108-120.
- 858 **Ryder NS.** 1991. Squalene epoxidase as a target for the allylamines. *Biochemical Society transactions* **19**, 774-777.
- 859 **Saenz JP, Grosser D, Bradley AS, Lagny TJ, Lavrynenko O, Broda M, Simons K.** 2015. Hopanoids as functional  
860 analogues of cholesterol in bacterial membranes. *Proc Natl Acad Sci U S A* **112**, 11971-11976.
- 861 **Saito S, Okamoto M, Shinoda S, Kushiro T, Koshiha T, Kamiya Y, Hirai N, Todoroki Y, Sakata K, Nambara E,**  
862 **Mizutani M.** 2006. A plant growth retardant, uniconazole, is a potent inhibitor of ABA catabolism in Arabidopsis.  
863 *Biosci Biotechnol Biochem* **70**, 1731-1739.
- 864 **Sawai S, Akashi T, Sakurai N, Suzuki H, Shibata D, Ayabe S, Aoki T.** 2006. Plant lanosterol synthase: divergence  
865 of the sterol and triterpene biosynthetic pathways in eukaryotes. *Plant & cell physiology* **47**, 673-677.
- 866 **Schaeffer A, Bronner R, Benveniste P, Schaller H.** 2001. The ratio of campesterol to sitosterol that modulates  
867 growth in Arabidopsis is controlled by STEROL METHYLTRANSFERASE 2;1. *The Plant journal : for cell and*  
868 *molecular biology* **25**, 605-615.
- 869 **Schaller H.** 2003. The role of sterols in plant growth and development. *Progress in lipid research* **42**, 163-175.
- 870 **Schaller H.** 2004. New aspects of sterol biosynthesis in growth and development of higher plants. *Plant physiology*  
871 *and biochemistry : PPB* **42**, 465-476.
- 872 **Schaller H, Bouvier-Nave P, Benveniste P.** 1998. Overexpression of an Arabidopsis cDNA encoding a sterol-  
873 C24(1)-methyltransferase in tobacco modifies the ratio of 24-methyl cholesterol to sitosterol and is associated with  
874 growth reduction. *Plant physiology* **118**, 461-469.
- 875 **Scheinpflug H, Kuck KH.** 1987. Sterol biosynthesis inhibiting piperazine, pyridine, pyrimidine and azole  
876 fungicides. *Modern selective Fungicides - Properties, Applications, Mechanisms of Action*, 173-204.
- 877 **Schmitt P, Benveniste P.** 1979. Effect of Fenarimol on Sterol Biosynthesis in Suspension Cultures of Bramble Cells.  
878 *Phytochemistry* **18**, 1659-1665.
- 879 **Schmitt P, Narula AS, Benveniste P, Rahier A.** 1981. Manipulation by 25-Azacycloartanol of the Relative  
880 Percentage of C10, C9 and C8 Side-Chain Sterols in Suspension-Cultures of Bramble Cells. *Phytochemistry* **20**, 197-  
881 201.
- 882 **Schmitt P, Scheid F, Benveniste P.** 1980. Accumulation of Delta-8,14-Sterols in Suspension-Cultures of Bramble  
883 Cells Cultured with an Azasterol Anti-Mycotic Agent (A25822b). *Phytochemistry* **19**, 525-530.
- 884 **Schrack K, Mayer U, Horrichs A, Kuhnt C, Bellini C, Dangl J, Schmidt J, Jurgens G.** 2000. FACKEL is a sterol C-  
885 14 reductase required for organized cell division and expansion in Arabidopsis embryogenesis. *Genes &*  
886 *development* **14**, 1471-1484.
- 887 **Schrack K, Mayer U, Martin G, Bellini C, Kuhnt C, Schmidt J, Jurgens G.** 2002. Interactions between sterol  
888 biosynthesis genes in embryonic development of Arabidopsis. *The Plant journal: for cell and molecular biology* **31**,  
889 61-73.
- 890 **Schuler I, Duportail G, Glasser N, Benveniste P, Hartmann MA.** 1990. Soybean phosphatidylcholine vesicles  
891 containing plant sterols: a fluorescence anisotropy study. *Biochimica et biophysica acta* **1028**, 82-88.

- 892 **Schuler I, Milon A, Nakatani Y, Ourisson G, Albrecht AM, Benveniste P, Hartman MA.** 1991. Differential effects  
893 of plant sterols on water permeability and on acyl chain ordering of soybean phosphatidylcholine bilayers.  
894 Proceedings of the National Academy of Sciences of the United States of America **88**, 6926-6930.
- 895 **Shi J, Gonzales RA, Bhattacharyya MK.** 1996. Identification and characterization of an S-adenosyl-L-methionine:  
896 delta 24-sterol-C-methyltransferase cDNA from soybean. The Journal of biological chemistry **271**, 9384-9389.
- 897 **Shive JB, Sisler HD.** 1976. Effects of Ancymidol (a Growth Retardant) and Triarimol (a Fungicide) on the Growth,  
898 Sterols, and Gibberellins of Phaseolus vulgaris (L.). Plant physiology **57**, 640-644.
- 899 **Simon-Plas F, Perraki A, Bayer E, Gerbeau-Pissot P, Mongrand S.** 2011. An update on plant membrane rafts.  
900 Current opinion in plant biology **14**, 642-649.
- 901 **Simons K, van Meer G.** 1988. Lipid sorting in epithelial cells. Biochemistry **27**, 6197-6202.
- 902 **Sonawane PD, Pollier J, Panda S, Szymanski J, Massalha H, Yona M, Unger T, Malitsky S, Arendt P, Pauwels  
903 L, Almekias-Siegl E, Rogachev I, Meir S, Cardenas PD, Masri A, Petrikov M, Schaller H, Schaffer AA, Kamble  
904 A, Giri AP, Goossens A, Aharoni A.** 2016. Plant cholesterol biosynthetic pathway overlaps with phytosterol  
905 metabolism. Nature plants **3**, 16205.
- 906 **Soto G, Stritzler M, Lisi C, Alleva K, Pagano ME, Ardila F, Mozzicafreddo M, Cuccioloni M, Angeletti M, Ayub  
907 ND.** 2011. Acetoacetyl-CoA thiolase regulates the mevalonate pathway during abiotic stress adaptation. Journal of  
908 experimental botany **62**, 5699-5711.
- 909 **Souter M, Topping J, Pullen M, Friml J, Palme K, Hackett R, Grierson D, Lindsey K.** 2002. hydra Mutants of  
910 Arabidopsis are defective in sterol profiles and auxin and ethylene signaling. The Plant cell **14**, 1017-1031.
- 911 **Souter MA, Pullen ML, Topping JF, Zhang X, Lindsey K.** 2004. Rescue of defective auxin-mediated gene  
912 expression and root meristem function by inhibition of ethylene signalling in sterol biosynthesis mutants of  
913 Arabidopsis. Planta **219**, 773-783.
- 914 **Suzuki M, Kamide Y, Nagata N, Seki H, Ohyama K, Kato H, Masuda K, Sato S, Kato T, Tabata S, Yoshida S,  
915 Muranaka T.** 2004. Loss of function of 3-hydroxy-3-methylglutaryl coenzyme A reductase 1 (HMG1) in Arabidopsis  
916 leads to dwarfing, early senescence and male sterility, and reduced sterol levels. The Plant journal : for cell and  
917 molecular biology **37**, 750-761.
- 918 **Suzuki M, Xiang T, Ohyama K, Seki H, Saito K, Muranaka T, Hayashi H, Katsube Y, Kushiro T, Shibuya M,  
919 Ebizuka Y.** 2006. Lanosterol synthase in dicotyledonous plants. Plant & cell physiology **47**, 565-571.
- 920 **Tal B, Nes WD.** 1987. Regulation of sterol biosynthesis: importance of the C-24 alkyl group to growth of sunflower  
921 suspension cultures. Plant Physiol. (Suppl.) **83**.
- 922 **Tansey TR, Shechter I.** 2001. Squalene synthase: structure and regulation. Progress in nucleic acid research and  
923 molecular biology **65**, 157-195.
- 924 **Taton M, Benveniste P, Rahier A.** 1987. Comparative-Study of the Inhibition of Sterol Biosynthesis in Rubus-  
925 Fruticosus Suspension-Cultures and Zea-Mays Seedlings by N-(1,5,9-Trimethyldecyl)-4-Alpha,10-Dimethyl-8-Aza-  
926 Trans-Decal-3-Beta-Ol and Derivatives. Phytochemistry **26**, 385-392.
- 927 **Taton M, Benveniste P, Rahier A.** 1987. Mechanism of Inhibition of Sterol Biosynthesis Enzymes by N-Substituted  
928 Morpholines. Pesticide Science **21**, 269-280.
- 929 **Taton M, Benveniste P, Rahier A.** 1989. Microsomal Delta-8,14-Sterol Delta-14-Reductase in Higher-Plants -  
930 Characterization and Inhibition by Analogs of a Presumptive Carbocationic Intermediate of the Reduction Reaction.  
931 European Journal of Biochemistry **185**, 605-614.
- 932 **Thimmappa R, Geisler K, Louveau T, O'Maille P, Osbourn A.** 2014. Triterpene biosynthesis in plants. Annual  
933 review of plant biology **65**, 225-257.



934 **Titapiwatanakun B, Blakeslee JJ, Bandyopadhyay A, Yang H, Mravec J, Sauer M, Cheng Y, Adamec J,**  
935 **Nagashima A, Geisler M, Sakai T, Friml J, Peer WA, Murphy AS.** 2009. ABCB19/PGP19 stabilises PIN1 in  
936 membrane microdomains in Arabidopsis. *The Plant journal: for cell and molecular biology* **57**, 27-44.  
937 **Topping JF, May VJ, Muskett PR, Lindsey K.** 1997. Mutations in the HYDRA1 gene of Arabidopsis perturb cell  
938 shape and disrupt embryonic and seedling morphogenesis. *Development (Cambridge, England)* **124**, 4415-4424.  
939 **Valitova YN, Kotlova ER, Novikov AV, Shavarda AL, Artemenko KA, Zubarev RA, Minibayeva FV.** 2010.  
940 Binding of sterols affects membrane functioning and sphingolipid composition in wheat roots. *Biochemistry.*  
941 *Biokhimiia* **75**, 554-561.  
942 **Vanden Bossche H, Marichal P, Gorrens J, Bellens D, Verhoeven H, Coene MC, Lauwers W, Janssen PAJ.**  
943 1987. Interaction of azole derivatives with cytochrome P-450 isozymes in yeast, fungi, plants and mammalian cells.  
944 *Pesticide Science* **21**, 289-306.  
945 **Vriet C, Russinova E, Reuzeau C.** 2013. From squalene to brassinolide: the steroid metabolic and signaling  
946 pathways across the plant kingdom. *Molecular plant* **6**, 1738-1757.  
947 **Warrilow AG, Parker JE, Kelly DE, Kelly SL.** 2013. Azole affinity of sterol 14alpha-demethylase (CYP51) enzymes  
948 from *Candida albicans* and *Homo sapiens*. *Antimicrobial agents and chemotherapy* **57**, 1352-1360.  
949 **Wentzinger LF, Bach TJ, Hartmann MA.** 2002. Inhibition of squalene synthase and squalene epoxidase in tobacco  
950 cells triggers an up-regulation of 3-hydroxy-3-methylglutaryl coenzyme A reductase. *Plant Physiology* **130**, 334-346.  
951 **Willemssen V, Friml J, Grebe M, van den Toorn A, Palme K, Scheres B.** 2003. Cell polarity and PIN protein  
952 positioning in Arabidopsis require STEROL METHYLTRANSFERASE1 function. *The Plant cell* **15**, 612-625.  
953 **Xu J, Wang XY, Guo WZ.** 2015. The cytochrome P450 superfamily: Key players in plant development and defense.  
954 *Journal of Integrative Agriculture* **14**, 1673-1686.  
955 **Yang H, Richter GL, Wang X, Mlodzinska E, Carraro N, Ma G, Jenness M, Chao DY, Peer WA, Murphy AS.**  
956 2013. Sterols and sphingolipids differentially function in trafficking of the Arabidopsis ABCB19 auxin transporter. *The*  
957 *Plant journal : for cell and molecular biology* **74**, 37-47.  
958 **Yates PJ, Haughan PA, Lenton JR, Goad LJ.** 1991. Effects of Terbinafine on Growth, Squalene, and Steryl Ester  
959 Content of a Celery Cell-Suspension Culture. *Pesticide Biochemistry and Physiology* **40**, 221-226.  
960 **Yates PJ, Haughan PA, Lenton JR, Goad LJ.** 1992. 4 Delta-5,7-Sterols from Terbinafine Treated Celery Cell-  
961 Suspension Cultures. *Phytochemistry* **31**, 3051-3058.  
962 **Yoshida S, Uemura M.** 1986. Lipid Composition of Plasma Membranes and Tonoplasts Isolated from Etiolated  
963 Seedlings of Mung Bean (*Vigna radiata* L.). *Plant physiology* **82**, 807-812.  
964 **Zhao L, Chang WC, Xiao Y, Liu HW, Liu P.** 2013. Methylerythritol phosphate pathway of isoprenoid biosynthesis.  
965 *Annual review of biochemistry* **82**, 497-530.  
966  
967  
968  
969
